# Supplementary material for: Gene Structures, Evolution and Transcriptional Profiling of the WRKY Gene Family in Castor Bean (Ricinus communis L.)
Source: PubMed Central journal article supplement (PMC4743969; doi:10.1371/journal.pone.0148243), 2016-02-05
Supplement: pone.0148243.s001.pdf [file pone.0148243.s001.pdf]

**S1 File. The gene model for *RcWRKY03*.** The coding region is marked with uppercase letters, above which is its deduced amino acids. The transcribed untranslated regions, including 5' UTR, intron and 3' UTR sequences, are marked with lowercase letters. The start and stop codons are blacked and the misassembled "TTNNNTTGAC" sequence is boxed.

```

1  ttcaaagacagtgtcttctctgattatctcagtaattttaatttgcaatctttaatctgc
61  aattagtttcattctcatctccaaaaacgggaactgaaaaacttcattaccaagtccccg
121 taaacgcacgctctctccatccattttcaaaaattttaaatgacggtcaggtgactctta
1      M M D P N P P P P
181 tacttccctcctctaaatccaccgtctccgccaATGATGGACCCCAATCCACCACCACCG
10  S P P R Q Q P S F A D S E T L E M A S I
241 TCACCGCCGCGGCAACAGCCTTCCTTCGCCGACTCCGAAACCTAGAAATGGCCTCCATT
30  N D A L N D T S T S Q N E S S R G S I A
301 AATGATGCTCTAAACGACACCTCCACTAGCCAAAACGAGAGTAGCAGAGGAAGCATAGCG
50  E R R A A K C G F K A D R I N T A R F R
361 GAGCGAAGAGCCGCAAATGCGGTTTTAAAGCAGATAGAATTAATACGGCGGATTCCGT
70  T I T P L T      S P A A A V R S P C I
421 ACAATCACTCCCTTGACTTTNNNTTGACTTCCGCCGCCGCGGTGTCCGCTCGCCGTGAT
87  T I P P G I S P T A L L D S P I M L P N
481 AACTATTCCGCTGGTATTAGCCCCACCGCGCTTCTCGATTACCGATTATGCTGCCAAA
107  C Q
541 TTGTCAGgtcaatttcatttattttattttcatttccgtttcttagctttgcaattttctt
601 ttaatttttactaattaaaatttttaaatgtaacatgtcgattgcaaatttagaaaaaaa
661 acatttaatatgcatgttagcttagtaaaacgacaaatgatttcgtgtttgatgttttta
109                                     P
721 atgtgttttattatatattaatttttctcttttattttattttactttttgggtgcagCC
110 S P T T G S F P F P L M N C G S S A T P
781 TTCTCCAACACTACAGGAAGTTTCCCGTTTCCGCTTATGAATGTGGAAGTTCAGCGACTCC
130 A D V E N S S N G G S Y T L K P Q N G F
841 TGCTGACGTGGAGAATAGTAGTAATGGCGGTTCTACACATTGAAGCCTCAAAATGGCTT
150 A A L E A E
901 TGCTGCCTTAGAAGCTGAGgtacttgtttaagtaatgatatttacgcaagaagcagcagc
961 tatgtaacctcttttaattgttcatacgggtcttggttcgggtacaatctgattttttctg
1021 cattaatatgcatcgtctacttgatagcactatatgaattgtgtaattttatcaatgttt
156                                     R S N A G D
1081 caactgagacttatatgccttctgcattttttactcttgggtagAGAAGTAATGCTGGTG
162  F Q E V G S L M E F E F P V E F L K Q A
1141 ACTTCAAGAAGTTGGCTCGTAAATGGAATTTGAATCCCAGTGGAGTCTTAAAGCAAG
182  I T E S Y A E N S A T D I K V L N S M V
1201 CTATCACAGAGAGTTATGCTGAAAATTCGGCAACTGACATCAAAGTCTAAATAGCATGG
202  T D A N L S D V Q M D S I P E E N V G T
1261 TTACAGATGCCAACTTGAGTGTGTGCAAATGGACTCCATCCCGAAGAAAATGTTGGGA
222  C H P E E E E K G R L S A T G I A R N S

```

1321 CATGCCATCCTGAGGAAGAAGAGAAAAGGGAGACTCTCTGCAACAGGGATTGCAAGGAATT  
242 E D G Y N W R K Y G Q K Q V K G S E F P  
1381 CAGAAGATGGATAACAATTGGAGAAAGTATGGACAGAAGCAAGTCAAAGGGAGTGAATTCC  
262 R S Y Y K C T H P N C Q V K K K I E R S  
1441 CAAGGAGCTACTATAAGTGTACCCACCCAAATTGTCAGGTAAAGAAAAAATAGAGCGTT  
282 H D G Q I T E I I Y K G T H N H P K P Q  
1501 CTCATGATGGTCAGATAACAGAAATCATCTATAAAGGTACCCATAATCACCTAAACCTC  
302 P S R R A H V G S T S S F D E V P E I D  
1561 AGCCTAGTCGCCGAGCACATGTTGGATCGACTTCTTCATTTGATGAGGTGCCAGAGATTG  
322 E G N A T C F K V E I G S A W K N P Q P  
1621 ATGAAGGAATGCAACCTGTTTCAAAGTAGAAATTGGGTCTGCTTGGAAAAATCCGCAAC  
342 G S N G G L E R T S S A S V V T E L S D  
1681 CAGGTCCAATGGGGTCTGAAAAGGACGTCTTCAGCATCTGTTGTGACAGAGCTTTCTG  
362 P L S T T Q G K S I G T F E S A G T P E  
1741 ATCCTCTATCAACCACTCAAGGAAAATCTATTGGTACATTTGAATCAGCAGGAACACCAG  
382 L S S T L V S N D D D D D G A T Q G S I  
1801 AGCTTCTTCCACACTTGTTAGTAATGATGACGATGACGACGGGGCCACTCAGGGAAGCA  
402 S L G V D A D I E E S E S K R R  
1861 TATCACTTGGAGTGGATGCTGATATTGAGGAATCCGAGTCAAAAAGAAGgtattttatctc  
1921 tgttctttgctgtgtatctgcatagcagaagaacatgataagttgtttctattttctttct  
418 K I E S C L V E T  
1981 ttttttttaatttttattttctcacgttcagGAAAATAGAAAGCTGCTTGGTTGAAACA  
427 S L S S R A V R E P R V V V Q I E S E I  
2041 AGTCTGTCATCCAGAGCTGTTCCGGAACCAAGATTGTTGTCCAAATAGAGAGTGAAT  
447 D I L D D G Y R W R K Y G Q K V V K G N  
2101 GACATACTTGATGATGGATAACCGCTGGAGGAAGTATGGTCAAAAAGTTGTGAAGGGTAAT  
467 P N P R  
2161 CCAAACCTAGgtactgacattttatactgttttaactaaacttcatcttcctatgaatt  
2221 tttttcttattttaaaatggatagcactgggttacacatttgatgtttcggagtaaaataa  
2281 agtgatatatttgcttttaggatttcagttatctgttttagttttatttactctcttgggt  
2341 gatacatatttgcatctcaggtacattggagatggtcaaaagttggttgattgatgcaat  
471 S Y Y  
2401 taaaatgcattcttttttgaatatctctctgacttctttttcttcgacagGAGTTATTAC  
474 K C T S A G C S V R K H V E R A S H N L  
2461 AAATGCACGAGTGTGGATGTTTCAGTGAGAAAACATGTGGAAAGAGCCTCCCACTTG  
494 K F V I T T Y E G K H N H E V P A A K N  
2521 AAATTTGTCATTACAACATATGAGGAAAACACAATCATGAAGTGCCTGCAGCCAAAAAC  
514 S N N L S S G G T S L P Q V T T N A Q P  
2581 AGCAATAATCTGAGCTCAGGTGGTACCAGTTTACCTCAGGTTACTACCAATGCACAGCCT  
534 A L T L A R N T N R T K P E T Q M Q D Y  
2641 GCCCTGACATTAGCCAGAAACACCAACAGGACAAAACCTGAAACACAAATGCAAGATTAT  
554 A P G F D R K P V F N N D Y S R L S F P  
2701 GCACCTGGCTTTGATAGAAAACCAAGTATTTAAACAATGACTATTCGAGACTTAGTTTTCTT  
574 G H F S N E M K L G A S S I Y P L K F P

2761 GGACATTTAGTAATGAGATGAAGCTCGGGGCTTCCTCCATCTATCCATTGAAGTCCCA  
594 P L Q H T M P Y S S L E F N R G A T H H  
2821 CCCCTTCAACATACCATGCCTTACAGCTCTCTGGAATCAATCGCGGTGCTACCCATCAC  
614 S S S M A P V V P D F Q I S L P S S L H  
2881 TCTAGCTCTATGGCTCCAGTTGTTCCAGATTTTCAAATTCGCTGCCATCAAGTCTGCAT  
634 T S A N L S M P G A D F N Y N G R P I S  
2941 ACATCTGCAAATCTTCTATGCCTGGTGCTGACTTTAATTATAATGGGAGACCTATTAGT  
654 Q G Q P F L S G Q P F L S G Q Q L V L P  
3001 CAAGGTCAGCCTTTTCTGTCAGGCCAGCCTTTCCTGTCAGGCCAGCAGTTGGTCTTGCCC  
674 K Q E Q R D D D H F D A G Q A T F E H V  
3061 AAGCAAGAACAAGAGATGATGATCACTTTGATGCTGGCCAGGCCACCTTTGAGCATGTA  
694 N G S L S S S V Y Q R I M G N F P S \*  
3121 AATGGGTCTCTGTCATCATCAGTATATCAACGCATCATGGGAAACTTCCATCATAAaag  
3181 aaggaactttgcttttgaaatactgtcaggttaaaaacaaatggaaaaggaaaaagaaaa  
3241 agaaaaga
