# Supplementary material for: Gene Structures, Evolution and Transcriptional Profiling of the WRKY Gene Family in Castor Bean (Ricinus communis L.)
Source: PubMed Central journal article supplement (PMC4743969; doi:10.1371/journal.pone.0148243), 2016-02-05
Supplement: pone.0148243.s002.pdf [file pone.0148243.s002.pdf]

**S2 File. The gene model for *RcWRKY06*.** The coding region is marked with uppercase letters, above which is its deduced amino acids. The transcribed untranslated regions, including 5' UTR, intron and 3' UTR sequences, are marked with lowercase letters. The start and stop codons are blacked and the sequences misannotated as the second intron are boxed.

```

1 aataatccttttattattattatTTTTctcttcttctattaaccttccttaaattcattt
1      M A S F T T S S S S S S S C S L N T
61 cttttcATGGCATCCTTACTACTTCTTCTTCTTCTTCTTCTTGTAGCTAAATACT
19 S I N S Q S S F F S T Q F L M T N P S S
121 TCTATAAATTCTCAATCCTCCTTTTTCTCAACGCAGTTCCTCATGACTAATCCTTCTTCT
39 S S L S S F T D L L S S G N I N S K D N
181 TCTTCATTATCTTCTTCACTGATCTTCTTCTTCTTCTGGTAATATTAATTCTAAGACAAT
59 N M D N I N V G W G L F D H G N G I D I
241 AATATGGACAATATTAATGTTGGCTGGGGACTTTTTGACCATGGCAATGGTATTGATATT
79 P K F K S F P P P S L P L S P P P V S P
301 CAAAATTAAGTCATTTCTCCTCCTTCTTACCTCTTCTCCTCCTCCTGTTTCTCCT
99 S S Y F A I P P A G L S P T D F L D S P
361 TCTTCTATTTTGCTATTCCTCCTGCTGGTTAAGCCCAACTGACTTCTGGATTACCT
119 V L F S T S N
421 GTTCTTTTTTCCACTTCTAATgtaagttgcattgtatTTTTactcctgggttttagatTTT
481 aacttgTTTTcacatgttcttgttactaaatatctatTTTgTTTgTTTgTTTgTTTgTTTg
126      V V P S P T T G T F A G Q T F N W R
541 tttcagGTTGTTCCATCTCCAACACTACTGGGACTTTTGTGGTCAAACCTTCAACTGGAGG
144 S N I S N D N Q R G F K G D E K T Y S D
601 AGTAATATTTCCAACGATAATCAGAGAGGTTTTAAAGGGGATGAGAAAACCTACTCTGAT
164 F S F Q T Q T R P L L A S S S S S S S L
661 TTTTCTTTCCAAACCAAACAAGGCCTTCTTGTCTTCTTCTTCTTCTGTCTTCATCATTAA
184 S S S I F Q S S S S I I S G
721 TCATCCTCTATCTTTCAATCTTCTTCAAGCATCATTCTGGGgtatgatttatgattcaa
781 cagacatcattctgtttcctgtatatactTTacttaatttgggtgtttaattgtttatc
841 cttctTTtaaggccaattgtatataaaagaaatgctcttaccTTTTgtctttatgattt
901 tgaccctgttagttgcaaactTTgaggaatgaagtaaagtgtaactgcaaatcattg
961 caggtcgactagaaatgaagtcacatgtttgctttaggacaaaccgtctggataaatc
1021 aatataaaaagatacttcttgtttaaactccaataatTTTcttgaaaaagaatacaa
1081 gaatcaagagaggagacaagtttcttctgtctTTTTatcatgctgtgatgagttggggtc
1141 actgatactagTTtaagggttgagataataaattcgaactcaaaggagccaaattgta
1201 ttacaaagaaaagaaaaacttctacaaaagaattgtataaaagaagcaaaaaatata
1261 tgtaaactTTTTctacagatatagtgatgaaaagcaatatgctatctatgctctataatc
1321 attcaattgcatcctagTTTgTTTTgaatttgttcttgctaacctccctttcattcgac
198      D E S M K K Q Q E A W N F K K P I K Q A
1381 agGATGAATCGATGAAAAAGCAACAAGAAGCCTGGAATTTTAAGAAACCCATAAAGCAAG
218      D R P S E K G V V K Q E F T P V Q S F S
1441 CGGATAGACCGTCAGAGAAAGGAGTAGTAAAGCAAGAATTTACACCAGTGCAGAGTTTCT

```

238 S E M A P L Q S S M Q T N A V A P Q P Q  
1501 CTCAGAAATGGCTCCACTTCAGTCAAGCATGCAAATAATGCGGTTGCTCCTCAACCTC  
258 P S Y N H Y S Q P A S Y M R E Q R R S D  
1561 AACCGAGTTACAATCATTACAGTCAACCAGCTTCATATATGAGAGAACAGAGAAGGTCAG  
278 D G Y N W R K Y G Q K Q V K G S E N P R  
1621 ATGATGGGTACAATTGGAGAAAATATGGACAGAAACAGGTAAGGAAGTAAAAATCCGC  
298 S Y Y K C T Y P N C P T K K K V E R S L  
1681 GTAGCTATTACAAGTGTACTTATCCAAATTGCCCAACAAAGAAAAAGGTTGAGAGATCTT  
318 D G Q I T E I V Y K G S H N H P K P Q A  
1741 TGGATGGACAGATTACGAAATAGTCTATAAAGGGAGTCATAATCATCCCAAGCCTCAGG  
338 R S S S Q L I Q L A A G G T Q E I S D Q  
1801 CTAGATCATCCTCCCAATTGATTCAACTTGCTGCAGGAGGCACTCAAGAAATCTCAGATC  
358 S F A P V E S V T M Q E D S S L S I G D  
1861 AATCTTTTGTCCAGTGGAAATCTGTACCATGCAGGAGGACTTCTCACTTCGATTGGAG  
378 D E F D Q S S P I S N S G G N E D E N E  
1921 ACGATGAATTTGATCAAAGTTCGCCAATTAGTAATTCAGGGGGAAACGAAGATGAAAATG  
398 P E A K R F  
1981 AACCTGAAGCTAAGAGATTgtaagttgaaaaagatcacaagactgatgattatgcttta  
404 K G Q  
2041 tgttctgtatctggattatgaatttaatagtaatctttcatggctttacagCAAGGGACA  
407 N E N E S I L A A G S R T V R E P R I V  
2101 GAATGAGAATGAGAGTATTTGGCCGCTGGTAGCAGGACTGTTAGAGAACCAAGAATTGT  
427 V Q T T S D I D I L D D G Y R W R K Y G  
2161 GGTGCAAACATAAGTATATTGACATACTTGACGATGGGTATAGGTGGAGAAATATGG  
447 Q K V V K G N P N P R  
2221 ACAGAAAGTAGTCAAGGGAAATCCCAATCCAAGgtaaattagtgatgatattcgatttct  
2281 tgctgtttccttgtttgaagaagtttgtttcatggatttataattgttgcaaatctttt  
458 S Y Y K C T S I G C P V R K H V  
2341 attctctacagGAGCTACTACAAGTGTACATCTATCGGTTGTCCGTTCCGAAACATGTT  
474 E R A S H D T R A V I T T Y E G K H N H  
2401 GAACGGGCATCGCATGATACAAGGGCTGTGATCACCCTTATGAAGGGAAGCACAACCAT  
494 D V P A A R G S G Y A S N R L P V N A N  
2461 GATGTTCCAGCTGCTCGTGGCAGCGGTATGCTTCCAATAGACTTCCAGTCAATGCTAAC  
514 S S M P I P I R P S V T A N T N Y S N S  
2521 AGCAGTATGCCGATTCCTATAAGGCCCTCGGTCACAGCCAACACAAATTACTCAAATTC  
534 L N S T R S S G N Q A P F T L Q M L Q G  
2581 CTTAACAGCACAAGATCATCAGGAAATCAAGCACCATTACCCTGCAAATGTTGCAGGGT  
554 T G N I G F S N F G K P S A S Y M N Q T  
2641 ACAGGGAATATTGGATTCTCAAATTTGGAAAGCCAAGTGCATCCTACATGAATCAAACA  
574 Q Y T E N V F S G A K E E P K D D S F L  
2701 CAGTACACAGAAAATGTGTTCTCAGGGGCAAAGGAAGCCAAAGGATGACTCATTCTC  
594 D S F L C \*  
2761 GACTCATTCTATGCTGAaacgactaactccaaagtagcagtttaggattcagggaaaatt  
2821 tgttgtgtagatttgcctgtaatagtgtaatgtaggttatagttgcaattttttcattt

2881 gttttgaggccttttgaagctctatagattaggcctcaattttattacagtacagaataat  
2941 tcaacagaaatacaatgaacacttttcttagcaatctcatttgagtctgtagaagttaa  
3001 agaagttcctaaaatcattttcttttctcttatcttcttagattgataataggacttcta  
3061 caaagcatttttctttctgatacgacaaaaacatctaaatacaggaaacagaaggatct  
3121 tgtttgcatcactctgtattgaagacaagtatttacttacattgaagttaatagtttatt  
3181 aattagcaatcaacacttaaagaatctgaaacaaaacaagccttggaaattaaacataa  
3241 gattgagtagataacttgatcctgaaataagagccgatacagccgacacaaaaaatgca  
3301 aagaatgccatgctaattggatgctgcggaggagtctgtaaatatgttatctgcaccttct  
3361 cgcactctgtttgtcataggaactgctgtagaagctgaggatatcaacaaataggataga  
3421 agctgcaaccaaaccacaaaaataatacaacaggaaagtaaatcaataaggcatatta  
3481 tcttaaatttcaatttaactcatcatctgttaacagtatgcaataactcaaaagaatgtg  
3541 atggtaaggatggaaatttttcagtgcacctatatatgatataaaactgactcctaaga  
3601 aatagcttttatgaatgaatcccatattgaatattctaattcattctggaattcttttta  
3661 tatccttaaaggattggtttctatgagaataagtcatggttcaaaattgggtccatgt  
3721 gcatgctgacacatagatgctctagaagcaaaaggaagtgggaagaacatgaggctaggg  
3781 catatcaagtcatatggctcacgcaaatgtcaagtcacaccagagacgtttcctatgtt  
3841 tttcacgacagtatcatttctagaaagtgttaattgctttttctccaagaacagaaagga  
3901 tttttctcattgttcaatcaaggaatctccaattccaggctctagaaaaccactaatggc  
3961 acttgaatatttgactctttttctcatccttcaaaatcaaacactttaatcattgaatt  
4021 tcacagaaaacctcacatattaatcattttatagataaaactagtacttacttttttct  
4081 accggtcccagatatacatatataattgttttcaaacatacatttaatttgagaaagggtg  
4141 tgaagtactgatatttataaaactgcccggaccaatattttgttactgaaataaaaagat  
4201 ggcatngacattttttgattaaagcaattccaaggttccatgttagttaatatcaatgt  
4261 cttctaaattaaaattgcagcaatgaagaattactagactgtcctaactaaaaaagatca  
4321 tcttttatattaaagaaaatggaaacgaatcaataatatttcatgaccattcaagtcca  
4381 atcaataaaagttaaacttttcttattccaccaattcctcagcaacgtaacagaaag  
4441 tttaaaaaaaaaaaaaaaaaagaaagaaagagaaggaaaaagaacaaaagaaggttataa  
4501 taaaagaaagaagtctagcctgatcaccaaagaaatctaacaatagcagaagctgtcgct  
4561 gaaaaataagttttctgtgaaagctcatgaacatttcgcagcacttgtcctccagagt  
4621 acaaagtcgaaagtattgatattgccaacaagctacacccaaatccatcaataaatc  
4681 catattcaatcttacagaaaagaaaaatcttgatttgataatcagacatgaaactgacct  
4741 gtactcttcatatctatcaaagttttccaatccccatgtttattactagccatgataat  
4801 aaaagcaagcaagagaacaaaa
