# Supplementary material for: Gene Structures, Evolution and Transcriptional Profiling of the WRKY Gene Family in Castor Bean (Ricinus communis L.)
Source: PubMed Central journal article supplement (PMC4743969; doi:10.1371/journal.pone.0148243), 2016-02-05
Supplement: pone.0148243.s003.pdf [file pone.0148243.s003.pdf]

**S3 File. The gene model for *RcWRKY07*.** The coding region is marked with uppercase letters, above which is its deduced amino acids. The transcribed untranslated regions, including 5' UTR, intron and 3' UTR sequences, are marked with lowercase letters. The start and stop codons are blacked and the misannotated sequences “gcaa” and “GCAG” are boxed.

```

1 aatttcaggacagcacggaactaccgcaaaaccagatacatgaaagaaaaggagagagag
61 gaagaacaagaacaaaatcccatttctaacgccataaagatagaagaagagaattaa
121 aaccaaaaagcaactgccgtaaactcatgttcttattgtactaacagaaagaagaaaga
1
M A A
181 aagtggttttggtgagatacgaacaaagagaacagtaaggtttctttccaATGGCAGCA
4 E K Q A P P R P T I T L P P R P S M D T
241 GAGAAGCAAGCACCACCACGCCCTACAATAACTCTGCCCGGAGGCCATCTATGGATACC
24 L F T G G L S P G P M T L V S S F F S D
301 CTTTTCACTGGTGGACTTAGTCCGGTCCCATGACTCTTGTCTCTTCTTTTTTCTCTGAT
44 N Y L D S D S R S F S Q L L A G A M A S
361 AACTACCTGACTCTGATTCCCGTTCTTCTCTCAACTTCTCGCTGGTGCTATGGCTTCT
64 P I A R P S F F T D A S S N K Q D G L D
421 CCTATTGCAAGACCTTCCTTTTTACCGATGCCTCTTCTAACAAGCAAGACGGACTTGAT
84 N S A N L G F K Q S R P M N L V V A H H
481 AATAGTGCCAATTTGGGGTTAAGCAAAGTAGGCCTATGAATTTAGTAGTTGCTCATCAT
104 S P L F T V P P G L S P S G L L N S P G
541 TCTCCATTGTTACTGTCCCGCCTGGGTTAAGCCCTTCTGGTTTGTTAAACTCACCTGGC
124 F F S P P Q
601 TTCTTTTCTCCTCCTCAGtaattttcttgtttttggatctgaataattccttggttggtt
661 tttatgtttcgcttggtatggtatgttggtgccttcttagcaattcgggtggttagttt
721 gcgattggatggttagtgttttgattgcttatgagatttgatggattgagttttttat
781 tttttcttttgccttgttatgatcatagaaaaagatttgacctttttcctttttttt
841 ttggtgatatttattgtcaattgaaatagtttgagagtttgagagcgagaagggtgatt
901 tgggtgctccttgttggaatttgatgaaataataggctggatttttagatgagcagaatt
961 ttcggtgcttgttgattatgcaattgagaaagtataacatttatgagcttaaatattag
1021 ctcaaatatagtggttttatatgttattatgctcagtcgtgagcaaatattatcgacaa
1081 ttgaaagaaaactgaaattctttttccttgtaacacgagggagtgaggaaccctaactt
1141 gcaaacctttgcctatcttctggtgagttctgcattggaaccttttatacctagtcta
1201 caacctagcaaattatcagtttccccaggtcaggattggattacagcttcattatag
1261 caaggatgatttatttgttcttggataaaaagaagaatttgattaacacagattat
1321 ccgaagtgttgaatgtgactggtcaggtgacagcaaatggagtttggtttaataattt
1381 gattaaacaaccttccagccgtctaattcggtgactcaaagccttgcatgctcatgct
1441 tatggttaaggtagtgaataaattgacagtgcaacaataatgtgctgaaacacatgt
1501 ctttcttaggggagtaaactcatttgggtctgtaaatttaattcatgtttcctattatg
1561 ggtcttatgttttaatttctatcatacttttatttttaatttttagtacctaaattcctt
1621 ttgcatgattccttgagaaaattcaccagagatatgatgacatcatagcttgacatggat
1681 atagtattttataattttgaaaatttcaggtggtatgatgacacatcctatttcagcag
1741 gatttcttttggaaatcaatttacaagatacatagatttttgtgatacaaatcaacttgta

```

1801 aggattgtaatgggaaacacggttaaaattagggttgtaaatgagatttaccctacctg  
1861 gagaaatgtaattcttttctgggtcctggaaagatgtaacttatgtttttgtttgtttt  
1921 tccttaacttagttgaattctattaatattataattgtgcctgataaagagatgggcttc  
1981 caacctaattaaatgaacgaatacttgagaggaaacactctattctggcaacatttggt  
2041 gtgatggactgatgctgcttgaaccatattattgagcaatgacttgaaactggaagtga  
130 S P F G M S H Q Q A L  
2101 gacatttttttctatattataattgcagAGTCCTTTTGAATGTCCCACCAGCAAGCCTT  
141 A Q V T A Q A A L A A Q N H M H L Q A Q  
2161 GGCACAGGTTACAGCCCAAGCTGCACTAGCTGCCAAAATCATATGCACTTGAAGCGCA  
161 Y Q P A P V S A S T E L L T R Q P S F T  
2221 GTATCAACCTGCTCCAGTATCAGCTTCCACAGAGTTATTGACTCGGCAGCCCTCCTTAC  
181 P G E A S Q L Q M L P S T S E P H N S M  
2281 TCCTGGTGAAGCTTACAGCTACAGATGCTTCCCTCAACGTCTGAACCTCATAATCCAT  
201 V E A S D L S H S D R K Q Q P P L A V D  
2341 GGTGGAAGCATCAGACCTCTCTATTCTGATAGGAAACAACAACCTCCTCTGCTGTTGA  
221 K P S D D G Y N W R K Y G Q K P I K G S  
2401 TAAACCGAGTGATGATGGCTACAACCTGGCGCAAATATGGGCAGAAGCCAATTAAGGGCAG  
241 E Y P R S Y Y K C T H L N C P V K K K V  
2461 CGAATATCCGCGGAGTTATTACAAATGTACACATCTGAATTGCTGTCAAAAAAAGGT  
261 E R S S D G Q I T E I I Y K G L H S H E  
2521 TGAGCGTTCTAGTGATGGCCAAATAACTGAGATCATCTATAAAGGCTTGCACAGTCATGA  
281 Q P Q P N K R A K D S S D Q N G S T S S  
2581 GCAGCCTCAGCCTAATAAACGTGCAAAAGATAGTAGTGACCAAAATGGAAGTACAAGTTC  
301 Q A K P E P G S L S Q A G N I N K S N E  
2641 TCAGGCTAAGCCTGAACCTGGTTCCTATCTCAAGCTGGTAATATAAACAAATCGAATGA  
321 T F P A H S V H G M E Q E P T Q A N T E  
2701 AACCTTTCCTGCTCATTCACTGATGGGATGGAGCAGGAACCTACTCAAGCGAACACAGA  
341 L P G S S D S E E A G E M R A E D G N E  
2761 ACTACCTGGTCAAGTGACAGTGAGGAAGCAGGTGAAATGAGAGCAGAAGATGGAAACGA  
361 D E P N P K R R  
2821 GGATGAACCAACCCGAAAAGAAGgcaaggttaggaatttttcagtaaatgtagtcataac  
369 Q T D V  
2881 tggcttttcccccttattttctgaaaatatctaaccgagtgtagGCAGACAGATGT  
373 G T S E V A L P H K T V T E P K I I V Q  
2941 TGGGACATCTGAGGTTGCTTTACCACACAAGACAGTCACAGAACCAAAAATCATTGTGCA  
393 T R S E V D L L D D G Y R W R K Y G Q K  
3001 AACAAGAAGTGAAGTTGATCTATTAGATGATGGCTACAGGTGGCGCAAGTATGGCCAGAA  
413 L V K G N P H P R  
3061 GCTGGTGAAGGGAATCCTCATCCAAGgtgatcaattgattattgctttataggtctttt  
3121 gcctctagtggtttttgatgtctaggtggatttttagggagtttctaaagataatactt  
3181 gcaattacaatgtcaatcacagaaatccatctttattgccttcactatgaagtctgaaga  
3241 gtttctagtaggagaacaaaatacaaccgtctacaaaattccagagttttaccttat  
3301 caaatgacctgtcatatgatgccaagaattattgttttgaaagtttgcgatgagaatcccc  
3361 cgcaagatgaccccgagtttgccacttttgaaattaccctataatgagtacaataatga

3421 aaagtttctcgaagactcaaaatgtcctataaccttcattcagaaccctccccttgcccta  
3481 gagatttaattgtgcagtttccccataacctctttaaatatgagagccattagctcaaca  
3541 ctataccatagccatgatcttatgtttttgtccatctgctcttcttgacacttgctat  
3601 tacttgccaaatgtattcttgcacgtctgtaaaatggcttaaatatcttaccttttagaa  
3661 tctgttcattatgaaaatcttctctttaaatctgtaagaccttcttgcaatcgacggc  
3721 atcttctaagagagttttccatccactttatcatcatcattattattgtttttctta  
3781 aatattaatgattattattattatcattatctcaattacctagtttgtagtgaatTTTT  
3841 tttttggttatagctattgctttctatttagggctatatttgccactaaatcagggtat  
3901 tgttgttttcttatattcttggccaacatcctatTTTctcccccttcttggaatatata  
3961 tatatatatatatatctgtgtattttagcttatctTTTTgcttttggtgtataa  
4021 gacaaattacttcacatttgattctcctcttcttagcatctatgccatatttgagtatgg  
4081 ttattatttttgaatcacatgcaactgggtggtgaaatctctagattttagctagtgattg  
4141 gcaaggaataacttatagtttcatgccgtctatatatatatatggttaacttttatgtgc  
4201 ggggtttgaccgtttgccctttgagacattaatcctatattcatttctggttggtgtcg  
4261 gactaaatagaattgtttaaatTTTgatatcagctctcttTgaaacttgataaccaatgac  
4321 aatgatatcagagagggagagagagagagacagagttttgccctaattttgcccata  
4381 tatcaagattgttttataatcttctatatctctggcaatgatatgcctattctctggttc  
4441 tggaaatctgtcaaatttaagttcctattaagcttccaatattttggttattctatcat  
422 S Y  
4501 agatattgcttgctttctgggagtttcatttctaagtacttattatatgaaatGAGCT  
424 Y K C T S A G C N V R K H V E R A A A D  
4561 ATTACAAATGCACTAGTGCTGGGTGCAATGTCCGTAAGCATGTTGAGAGAGCTGCAGCAG  
444 P K A V V T T Y E G K H N H D V P A A R  
4621 ACCCTAAAGCTGTGGTAACCACATATGAGGGAAAACATAATCATGATGTTCTCCTGCAGCTA  
464 N S S H N T A N N S A L Q L K P Q K V V  
4681 GAAACAGTAGCCATAACACAGCCAACAACAGTGCACTACAATTGAAACCTCAAAGGTGG  
484 A E K H P F L F G N N D K R P V L L Q L  
4741 TGGCTGAGAAGCATCCTTTCCTCTTTGGGAACAATGACAAAAGACCAGTACTTCTACAAC  
504 K E E E I A V \*  
4801 TGAAAGAAGAGGAAATCGCAGTATAAatgctctgcttaaaactgctagagaactataagg  
4861 atgactccagccaactaacctggtagaatgaagaagagaggaaagtcttttgaaagtgg  
4921 gagaccttggtggttttggttctttttcattttggtgctttttctttttttttttttt  
4981 tttttgtttgttttacctttttgaatgaaatgtagttgtaattgttgctgctgcacatg  
5041 ttaacaatttgatacataacatttttactacagttatgtaaaattaaatttagaag
