# Supplementary material for: Gene Structures, Evolution and Transcriptional Profiling of the WRKY Gene Family in Castor Bean (Ricinus communis L.)
Source: PubMed Central journal article supplement (PMC4743969; doi:10.1371/journal.pone.0148243), 2016-02-05
Supplement: pone.0148243.s004.pdf [file pone.0148243.s004.pdf]

**S4 File. The gene model for *RcWRKY08*.** The coding region is marked with uppercase letters, above which is its deduced amino acids. The transcribed untranslated regions, including 5' UTR, intron and 3' UTR sequences, are marked with lowercase letters. The start and stop codons are blacked and the sequence of the first exon that was not annotated previously is boxed.

```

1                               M S E N E T H H S P P
1 catagagggacaaaacatattatctttaATGTCCGAAAACGAAACCCACCACTCTCCTCC
12 P A P S P A S T T S A S S A S A K S S T
61 TCCAGCGCCGTCGCCGGCATCCACCACCTCCGCGTCTTCAGCATCAGCAAAATCCTCCAC
32 S S R P T T I T L P P R S F N E T F F S
121 GTCCTCAGCCCAACCACAATTACTCTCCGCCAGCTCCTTCAACGAAACATTCTTCTC
52 T P T P N M G L G L G F S P G P M T L V
181 CACTCCTACTCCAAATATGGGTTTGGGCTTGGGCTTAGTCCTGGGCCATGACTCTTGT
72 S S F F S D S D D F K S F S Q L L A G A
241 CTCCAGCTTCTTCTGATTCCGATGACTTCAAATCCTTCTCTCAGCTTCTCGCGGCGC
92 M A S P A A V K A P P F P P A Q E D K I
301 TATGGCTTCGCCGGCAGCTGTCAAAGCTCCTCCCTTTCCTCCTGCTCAAGAAGATAAAAT
112 S A I G V T R T P A N L S I V P P P P T
361 CTCCGCCATAGGGTCACTAGGACGCCGGCAATTTGTCGATCGTTCCGCCGCCCGCGAC
132 F S P V A L L D S P G F G F F S P Q
421 GTTCTCTCCGGTGGCTCTTCTTGATTACCTGGGTTTGGGTTCTTTCTCCTCAGgtagt
481 tgataaattgaaaagggtgcctggtgtgtaaatagttttgtttgttttagttcatta
541 aatttctgaaagttctttttttatatttttccaaaagttttaagcaatttaataaa
601 acctactttttcttttctttaatgcaattaaggtagatggaggatgattttgatgaacaa
661 atgattgaacttaatgccataagtccagctgcttaagagtggagtaataagagagaaat
721 ttacagtaattttgagtatattaatggaagagtattttagtcattttaagttatttttc
781 actgtaattgagtctatttagaatggaggcagtaagactttgaccaggtatacgtctgtt
841 tcatgcttttagtttttagagaataaatcacgaaccagttccatttgtaagttttggcaa
901 aatgcctaaatggtccagccatggtgctccaatgccttgattttgtttttgtttttt
961 accaaaatgtccaatgaagggtgtgcttgaacttgacatttccattttgttatcatgct
1021 tatgtttttgagattaagccattgggctagtagctattttcctcattgatataatattag
1081 gaagttgaacccttgattacccttccctttgatatagagaaaatgttgggacattggt
1141 ctgcctagatgtatatcaataacgagaaatgaacagcttgatttattcttctttatatac
1201 tcttgtttgtcatcacataacatatgaacccttttgtttttctagaatcgtgtggctgc
1261 atttgtctttctgaatgttcccacatggtcttctctgtgctatgcttatacaacctataa
1321 gagcactctgttctcactgataattggcaccattttgtttcataaaggccaatgtttggt
1381 ctcctttatagtgattactgaaaggcgtgtaggagaacagtgcaagtatgtaagagtag
1441 ctatattagcagctcataaatgcaccatctttgtgcttattgtttgaaccaaatacattt
1501 taagcttatagatatataacagatttgagctgttattaatgttctcgtgatatgtcact
1561 aatgtgtctttattcacaatcattttcttttaacttattttaatcatctgtgaggtctg
150 G P F G M T H Q Q A L A Q V T A Q A A
1621 tagGGGCCCTTTGGAATGACACACCAGCAAGCCCTAGCCCAGGTTACTGCTCAGGCTGCA
169 E A N S H I H I Q A Q Y S S A P A T S S

```

1681 GAAGCCAATTCCCATATACATATTCAAGCACAAATATTCATCAGCACCAGCAACATCTTCG  
189 T Q F S S I S T N S T I H Q Q M P S S I  
1741 ACCCAATTTTCATCCATCAGCACTAATTCAACCATTACCAGCAGATGCCTTCATCAATA  
209 P D T N A S E K E L S D F S F P D Q R A  
1801 CCAGACACTAATGCATCTGAGAAGGAATTGTCAGACTTCTCGTTCTCGATCAGAGAGCA  
229 Q A S S V T V D K P A D D G Y N W R K Y  
1861 CAAGCTTCTCAGTCACTGTTGATAAACCTGCTGATGATGGCTACAATTGGCGAAAATAT  
249 G Q K Q V K G S E F P R S Y Y K C T H P  
1921 GGCAGAAGCAAGTGAAGGGCAGTGAATTTCTCGAAGTTATTACAAATGTACACATCCT  
269 S C P V K K K V E R S L D G Q V T E I I  
1981 AGTTGCTGTCAAGAAAAAGTTGAGCGATCTCTTGATGGTCAAGTAACCGAAATTATC  
289 Y K G Q H N H H P P L P N K R G K D A G  
2041 TATAAAGGACAGCACAAACCATCATCTCTCTACCCAATAAGCGTGGGAAGGATGCTGGA  
309 N M N G N Q N N Q T D S G L A S Q F Q I  
2101 AATATGAATGAAAATCAGAATAATCAAACCTGATTACAGGACTAGCTTCCAATTTCAAATT  
329 G N V N K L K D R K D Q E S S Q A M P E  
2161 GAAAATGTGAACAAATGAAAGATAGGAAGGATCAAGAATCAAGCCAGGCTATGCCTGAA  
349 H L S G T S D S E E V G D T E T G I D E  
2221 CATTATCTGGGACAAGCGACAGCGAGGAAGTCGGTGATACTGAAACTGGTATAGATGAA  
369 N D E D E P E A K R R  
2281 AATGATGAAGATGAACCCGAGGCTAAGAGAAGgtacttttgcaactaagttcttatttga  
2341 tcatacttaaatgatctgtattttaaatatattacatgtctaacaaaatctgtgttttgc  
380 N T E V R V T E P V S S H R T V T E P  
2401 agAAATACAGAAGTCAGGGTAACAGAGCCAGTTTCTCACATAGGACTGTTACAGAGCCT  
399 R I I V Q T T S E V D L L D D G Y R W R  
2461 AGAATCATTGTACAGACGACCAGTGAGGTTGATCTTTGGATGATGGCTATAGATGGCGC  
419 K Y G Q K I V K G N P Y P R  
2521 AAATATGGACAGAAGATTGTCAAAGGCAATCCTTATCCAAGgtggttactatcagcctat  
2581 ctgattatgacttggagcagtcattataataaaacaacattgttcttaggttctgataa  
2641 cattcattatcaatthaaattccttctttagtctatctagctcaaattgataggagtt  
2701 cttcagttcttagatatttatgcattttgctttgagaggccaaggcctcttactctct  
2761 ctgcatgggggatgcgggtggagtataaaattaaagaagatgaatataattatgcatc  
2821 agcaacaattatccttttaggcatagaattattgtctggaactgtttgttaaattaggt  
2881 acacagaaatgtaaccatataatattttagttagtgaccattgtggtcattataatct  
2941 caaatgcaaaatggtttgaaatcctgtcctcttattgtagtgccaaaatagcctgcatta  
3001 agaaaaaacatttgatagaaagttggtcttaagaacttcagtgaggagaaaacattgtggt  
3061 taaagttgggacatatccttctcttcttcttggctcttggataatctttgagcagat  
3121 ttttaagttcatattttctctctcagcttttcttctctgcttttagaaaaactgca  
3181 tgcttttgctgatatttgattatatttggttttgctagtcattatgaaaattaaact  
3241 attcttttggtgaacttttaatatctttctacatgtctaattatttattttctcttg  
3301 gtggagctttctcatcattgcatttctcatcaattcatgtattcatagagaaaaggte  
3361 aatggtgacatcttaacactttgctagtattatctcgaatgcttgggttctcattgctt  
3421 attctattgatagaatgtatacatggtgcaatacctagttttatcaaaacaatctagga  
3481 cccatgcatatcgatthtccattctgttcagctctccaaacatgcatgcttgcctatgg

433 S Y Y K  
3541 attttgatgttgacgtttaatttgaggtttccttcaatgatctacagGAGCTACTATAAA  
437 C T T V G C K V R K H V E R A A T D P R  
3601 TGCACAACGTAGGCTGCAAAGTCCGTAAACATGTTGAGAGAGCTGCAACAGATCCAAGA  
457 A V V T T Y E G K H N H D V P A A K G S  
3661 GCAGTTGTAACAACATATGAAGGAAAACATAATCATGATGTACCAGCGGCAAAAGGGAGC  
477 S H N I A H S N S S E L K Q Q N V E K N  
3721 AGCCATAATATAGCCCATAGTAATTCATCTGAGCTAAAACAACAAAATGTGGAGAAGAAT  
497 A V N N R R R D S S T N N R P P I A R L  
3781 GCTGTAAATAACAGAAGAAGGGACTCGAGCACCAATAATCGGCCACCTATAGCGCGTTG  
517 R L K E E Q I T \*  
3841 CGATTAAAGGAAGAGCAGATAACTTAGtttctttaagttatcacaaaagtaggatgccg  
3901 cagacatttactatgaatcaggaaaagctgtaagatatcttcgctgaaatctgtttttca  
3961 tgctctttgaggccattgttttcgtcaaggcccatgtcacaaactgccatattcaaaagg  
4021 aagaaaaaatcataaccacaagatagaaggaagtcaatctgaggcaaactttctcagatt  
4081 gatctacagggcatgcgatattgtttgtatttacacagtttagtaaatatatttcatttgg  
4141 aaatctgttcttgtgcattcttttgtacattatctggaagaaatgttgcaaatagctgtt  
4201 atacagttgttacatttggattttatgtttgaaagtgcagatatttttctactaa
