# Supplementary material for: Gene Structures, Evolution and Transcriptional Profiling of the WRKY Gene Family in Castor Bean (Ricinus communis L.)
Source: PubMed Central journal article supplement (PMC4743969; doi:10.1371/journal.pone.0148243), 2016-02-05
Supplement: pone.0148243.s005.pdf [file pone.0148243.s005.pdf]

**S5 File. The gene model for *RcWRKY10*.** The coding region is marked with uppercase letters, above which is its deduced amino acids. The transcribed untranslated regions, including 5' UTR, intron and 3' UTR sequences, are marked with lowercase letters. The start and stop codons are blacked and the misannotated sequences are boxed.

```

1 cacatatacccccaaccccacctttgtctttttctctctctttaaaaaagaaaccgatta
61 cgatacacaaaaattcgattccttctaaaaggaaaaaaaaagccggatataaacgtcg
121 gtatatcggcacggttttagattttatcggtttgagtttcggacactataaaattaa
1
1 M A E S
181 ttgaaaaggcaactgttttgaaactttactctctgagagagaattggcgATGGCAGAGAG
5 K S V E A L Q V Q H K R Q V D E H N D H
241 CAAGAGCGTAGAAGCTCTCCAAGTACAACATAAACGACAAGTTGATGAACACAACGACCA
25 V L E E Q E E D D D D E E E D S Q L S E
301 CGTTTTAGAAGAACAAGAAGAAGATGATGATGATGAGGAGGAGGATAGTCAACTCAGCGA
45 L D Q L G E S Q Q P E E L S S G P V E L
361 GTTAGATCAACTCGGCGAGTCGCAGCAACCCGAGGAGTTATCTAGCGGTCCAGTAGAATT
65 E A L V A V P T S T A I L E N K Q C V G
421 GGAAGCTTTAGTGGCGGTTCCGACTCCACGGCGATATTGGAGAACAAGCAGTGTGTAGg
481 taggtttttcaaaaagaattgcagagtgctcctttggaaatthaatttaattatattg
541 ttatagaaaaaaagagaagttattgtttgtttggtgagagtggaagtgtctgatctagc
85 L E D N A G L E K H V D D S E F K
601 agGTTTGGAGGATAATGCAGGTTTGGAAAAGCACGTGGATGATTCTGAATTCAGgttag
661 agaccaaaagtttttattattattatattattattatcattcatttctggctctttgctt
721 tgtttattcattatthaatttagttatttattacttttagtagttgtgttcttttgtgat
781 tttatgtctgtgcctgtttgaatctatttgaatttagtgtttagtatgcaaatgatttgt
841 ctgcgaaatgcaaatcttagagaattgatcttctgctagtagttgcatttgcctgacaga
901 tctttatttttacgttattttactttattcatttttaatttgagattgaagtgattctga
961 accgtgttttggattcattatgatatttcagttatatacttaatacaacaacatcagaaa
1021 tgtgccgactaaaggataatttgctaggaatggacttaagtttgaatthaagatgcttt
1081 atgtgctctccaaaagttaatattaacagtagacattgacacttctgggttttagtgcga
1141 tcctataaagaaaatatctaaatgctttgtctacgcggtacatgtgaatthtttcttaa
1201 agaaaagcataaatgtccatgaactgtagttgaagggtgagatcatggctaacctctaga
1261 aaacctaagattaaggaaaaacgttttggaaactgttgaaactattactgctttttaaac
1321 ttttgacaatacagtaaaagtgttccaaccgttttctatgcattgaactataagggcaat
1381 agcttttgaattgtatttgaatgaacaattgaatcaactgttttgaagggtgataaactt
1441 gtggaaatgattagacttgaatgtggaagaaaacaaaaggtgttgacatgctaggagttt
1501 ctataatcattgaccaatccttgcatttgaatgagtgaaataattattgctagtagtatt
1561 gatctaattctctaaacctttaaggatgaaagcatgcatatcaaaaacattaataaagaa
1621 tttaaaattaataatagttaaaaggattcatgcctcttctgcttctctttggagtagca
1681 ttggcggatgtatccttgaaggctctctatgggttttttctttaaaagggtaaaacttg
1741 aactgagtgatgcataacaatgttatcatcatgcattatctctcatcttttgtctaa
1801 gcatctaataaagatatgcacaaaaatcaaagcacaaaggttcactgcattgaaaaattg
1861 aaaaaataaaaagaaatatacttcaacttgtgatctttcttatgcaaaattatgggagc

```

1921 caaatgtcctaggtattcttctcttgcattcttgcgtcctactttaatgtcaatttagc  
1981 cataaatgattttccataaagggttagaaagcttatataatattagcatactctctcttg  
2041 aagattgccaaaatatatTTTTTtacctaggtttagggagctttattgctctgactgt  
2101 tacactttacctcaatgaacctgtgttatacacgtaatttacgcttgtaagagaactaa  
2161 atctcatttttcagaaattagagaccagagtatcacacctaactttaagggtccattaa  
2221 aagcttcaataaaaaaaaaagaatcgaagggtgatgatccgtacagttgacctcaagcag  
2281 ttctagattagagcttatttaagttgagcagtcagctctgtaagctgtaactaaaccattg  
2341 tccttttagtcaagtgaggagttgttatctactatttcagaacttaggtggctctttat  
2401 ctcaatcagcatcctgagctatgacaatgctttgcagcagcctgcagtaaatatggaaag  
2461 aaggtttcagttggtgcatgtatggttaccattatcgacatctgagttgatacagttta  
2521 agttagaacatttgcttaactttaagatagaatagggttagtatggtgttttagtttga  
2581 taaaatattactaggacagtcctcttgttttgactttactatgaatgatgaatgttctttta  
2641 gtactttggcgacctagctagaacaatttacatttcttattggcaaaattctcttcttg  
2701 tatttcttggctgctgctagttttaaaacatttaaacattaatgtgccagattttgtgt  
2761 agtgggtgtttgtgagacgtggactcacctctgacaagccaacagctgcaatctatgctt  
2821 tctaaattgcactctgaactctggatgcatctgtaattctagatactgtgcattttaaat  
102 E Q D G I S H P E V S G D  
2881 ttgtttaaattctttaatcagGAGCAAGATGGGATTTACATCCAGAAGTTTCAGGAGA  
115 V T S Q C A E A Q T Q N Q L Q S S V C P  
2941 TGTAACCAGCCAATGTGCTGAAGCTCAGACCCAAAATCAACTTCAGTCTTCTGTTTGTCC  
135 T S L S E L S P T S V T Q P I S S A P S  
3001 AACTTCTTTGTCAGAACTTCTCCAATTCTGTTACACAACCAATATCATCTGCTCCAAG  
155 P T L P E P R V S P S K F N N Y N A C I  
3061 TCCAACCTACCAGAACCAAGAGTGTCCCATCGAAGTTTAATAATTATAATGCCTGCAT  
175 P E A D Q Q N S S E L K S L S L P I V K  
3121 ACCAGAAGCAGACCAACAAAACCTTCTGAACTGAAAAGTCTTCTCTTCCCATTTGTGAA  
195 A H V L D G Y N W R K Y G Q K Q V K S P  
3181 AGCATGTTCTTGATGGTTACAACCTGGCGAAAATATGGTCAGAAGCAAGTGAAGAGTCC  
215 K G S R S Y Y K C T Y S D C C A K K I E  
3241 TAAAGGTTCTCGAAGCTATTACAAGTGCACATATTCTGACTGTTGTGCTAAAAAGATTGA  
235 C A D H S G H V I E I V N K G T H S H D  
3301 ATGTGCTGATCATTGGGCCATGTAATAGAGATTGTTAATAAAGGAACACACAGTCATGA  
255 P P R K N N S T R G S K V A L L S A P V  
3361 TCCACCTCGAAAGAATAATAGCACAAAGGGGAAGCAAGGTTGCTTTATTATCTGCCCTGT  
275 L E N S M K E H S M G M H T D S S Q S T  
3421 TCTGAAAATAGCATGAAAGAACATTCCATGGGCATGCATACGGATTCAAGTCAGTCCAC  
295 L F K D S I Q E T P N I S E K K R Q N S  
3481 GTTGTTTAAAGATTCTATACAGGAAACACCAAATATTTCTGAAAAAAGCGGCAGAATT  
315 S G S D G N G K I L I K E E H V S E P E  
3541 AAGTGGCTCTGACGGGAATGGGAAAATTCTTATCAAAGAGGAGCATGTCAGTGAACCTGA  
335 P K R R  
3601 ACCAAAAAGAAAGtaaggtgtcccttttcttctgtctgaattgaatttttcatctgt  
3661 gatgttggcactttctgatataactgtaaaaaggcagctttggatattagttgattacag  
339 M K K E N L E C S G T L

3721 ttttttctgcttattttatccagAATGAAGAAGGAGAATTTAGAATGTTTCAGGAACCTCTA  
351 L K P G K K P K F V V H A A G D V G I S  
3781 TTA AACCTGGAAAGAAGCCTAAATTTGTGGTCCATGCAGCGGGTGATGTGGGAATTTCA  
371 S D G Y R W R K Y G Q K M V K G N P H P  
3841 AGTGATGGATACAGATGGCGCAAGTATGGACAAAAGATGGTGAAAGGAAACCCCATCCC  
391 R  
3901 AGgtgcatgtttatttctttatttgttctttgcttgcattgggattttgacctggtatac  
3961 taatacaaattaacatcagataatgcagtttagatgccatattaactatataatatatgca  
4021 aagtgtagtttcttggtttgttctatttattatcatagtggaagaaagtatcataac  
4081 gcggaaattgatttatttctctcatttttttaatgctcatgctactatggctctttctt  
4141 tgtgtgcaaacatcatgctattagagatcatgttctctggatggagattttttattactct  
4201 gttgcttttagattttggcaaaagcatttgaatatgaatcagctctaaaatatgcaacttc  
4261 tttcttcgttataatattttgggagttgtgtcatgttccagttacaagaccaaataatt  
4321 taggtgaaactgctttgttctctggagagtatttgggaaaggagtgactaaaatgggg  
4381 gtctttgagattttgtgcaattgtcatgttccagttacaagagtttgtgtaccacaaat  
4441 gctatgtcttttgaaggacattcactctaacagaccagtttcaaatgaatgttgatgcaa  
4501 gtcctataaggacatggcttcctatgaattatggttgggtgacgagtgaggagaataatggc  
4561 atttttgatagataaacttatagttggtcttctggcttctggatgaggggtacaactgaagc  
4621 atttctatgaggtggcttataggaagaattgtatctcggatagctcttgaagaatagc  
4681 ttttcaaatggatgtttaccagtgatatacaacaagccaagtcactcatgatttttgga  
4741 tgatgagcagtgagatagatattttctcccttttattgtaaacctttgcacattactct  
4801 tctcgtcctctgatgggtagcagagttcgttaaaacatttaattccaacttttgaggt  
4861 caaatgcaggagtggtggccataggttctgcaatgatgatacaagagtaggtagataaaa  
4921 aacaccttctttcccttttgtttcttccataaattttaggaaaattcttaattttctat  
4981 gataaagggaagttcttttttcttattagaattcctgcatccctgatagaatctcaac  
5041 atatttgaattgaggaagtagcatccaaggtcataatctatgtagtagctctgattatc  
5101 atttctcggtccgagttagatcttccaaattcaatccagcctgtggattctgttcttttg  
392 N Y Y R C T S A G  
5161 tgctgatttctcactctaaacaaattgtgcagGAACTATTACAGGTGCACCTCTGCTGGA  
401 C P V R K H I E T A V D N T D A V I I T  
5221 TGTCAGTCCGTAAGCATATTGAAACAGCGGTGGACAACACAGATGCGGTCAATTATAACA  
421 Y K G V H D H D M P V P K K R H G P P S  
5281 TACAAGGGAGTACATGACCATGACATGCTGTACCCAAAAAGCGACATGGTCCGCTAGT  
441 A P L V A A A A P A S M S N L Q L K K T  
5341 GCTCCCCTTG TAGCTGCTGCTCCTGCTTCTATGAGCAATTTACAGCTCAAGAAAAC T  
461 D T L P N Q I S S T Q W S V G K E G E L  
5401 GATACATTACCGAACCAATAAGTTCAACCCAATGGTCAGTGGGAAGGAAGGTGAATTA  
481 T S E T L D L G G E K E K A I E S A R T  
5461 ACTAGTGAAACCTTAGACCTTGAGGGCGAGAAGGAGAAGGCCATCGAATCAGCTAGAAC T  
501 L L S I G F E I K P C \*  
5521 CTTCTAAGCATTGGATTTGAAATCAAGCCTTGCTGAtaggtatcttttctgactatgge  
5581 ataaactaaaagattctgttcttggtaaaatcacgtagttgtctagatgtgaattatc  
5641 attaaattattaggtctgattgatgatggtttctttttcttctctctttcttatatt  
5701 ctgettacccttttcttcttttcttcaaatcttcttcttcttctcagccttctcactc

5761 tatcatggaacagttgtatatttggtattgtacgcagcaggaagaccttgagatatg  
5821 gtaagctaatagtattggaaggcggcagtcggcaccaatTTTTTTTTTctcat  
5881 cttggtgggaccatttgtttcaagatctcattcaggattagtgtctgcatTTTTgc  
5941 tgcgatctagaattattagaatggtagttggcagctTTaaaggTggccttTgttga  
6001 gtgatgaaattggagcacggggagcaggaaacctgtcaaatatcagatctaaagaacttc  
6061 cagtgtcccagtgcaaaaaggaaaaagaaaactgtaataaaaattaatgtaaggTggaa  
6121 atcccaactgttcaaattggtcataagattataattagTccaagtagTtc
