# Supplementary material for: Gene Structures, Evolution and Transcriptional Profiling of the WRKY Gene Family in Castor Bean (Ricinus communis L.)
Source: PubMed Central journal article supplement (PMC4743969; doi:10.1371/journal.pone.0148243), 2016-02-05
Supplement: pone.0148243.s007.pdf [file pone.0148243.s007.pdf]

**S7 File. The gene model for *RcWRKY18*.** The coding region is marked with uppercase letters, above which is its deduced amino acids. The transcribed untranslated regions, including 5' UTR, intron and 3' UTR sequences, are marked with lowercase letters. The start and stop codons are blacked and the misannotated sequences are boxed.

```

1  cagaagtaggtgaaatatagttgcctttaacccttgggtgcaagataggtattcagactt
61  ttttttcaaaatccatatctatcaaaaaccgcctcctcttttcttcttttccatgtatg
121 tagacatgttctcttctgtccaacctcttctcaccttccaccacttcttttgaccctata
181 tatatatatatatatatatatactaatccaaaacatcttcagttcctctctgaacat
1      M E G Q E T P Q P P L L V H
241 tctatctggagccccacaaATGGAAGGACAAGAAACCCCAACCACCATTATTAGTCCA
15  E L P P Q N S P Y L F T P P H P L L P S
301 TGAACTGCCACCCAAAACTCTCCCTACCTCTTTACACCACCACATCCACTACTTCCATC
35  S S L H P P V I D P Q V V L P D I D W V
361 ATCTTCATTGCACCCTCTGTAATTGATCCTCAAGTTGTTCTTCTCTGATATCGACTGGGT
55  A L L S S Q S V V G E N R P M M M E N A
421 TGCCCTTCTCTCCAGCCAATCAGTAGTTGGTGAGAATAGGCCAATGATGATGAAAAACGC
75  S L I G E T G A E E E K G N K D K L R K
481 TTCTTTAATGGTGAACAGGAGCTGAGGAAGAAAAGGGCAATAAGGATAAGCTAAGAAA
95  S G R I K K H I T P R F A F Q T R S A D
541 AAGTGGCAGAATCAAAAAGCACATCACGCCAAGGTTGCTTTCAAACCAGGAGTGCTGA
115 D I L D D G Y R W R K Y G Q K A V K N S
601 TGACATTCTTGATGATGGATATCGATGGAGAAAATATGGGCAGAAAGCTGTCAAGAACAG
135 S Y P R
661 CTCATATCCCAGgtgtgcacatgtaaatagttctcaaggtcatggacttaattaatacaa
721 tgctcaaaaactcaattcataatgccgcttgagatagcaataaagattgtggatcgtctt
781 tattacatttttcagcaggtttataaataccatgcatgctttaattatataaaaactga
841 gttagtttaaggtttattaattttaggtgagcgacaatgaaaactccaagtttctcctaga
901 atagagacttaagaattctcatctcaactagacataatactttatagttatagctagt
961 tatgttaatgtttgataagaatgtctttcatttaagaattgaactgaaaactctgaacaa
1021 ttaagcaataatggagacaattaattaactaaaatagttatgttgatttcaaaagtaaa
1081 taaaatagtagtggtgtaatgtgccgttttgatttgaaatttggtcggatatgaagctct
1141 aattgatggaaaaatataatagttatgatacagaatagacctaatgatgctatgttaata
1201 atatgtttatgctaaaacttaaatgaaaattctggttaggaaatatttttttagtcttaa
1261 ttatataaaaaataataatctgaaattggcaaaaagaaccttaaggaaaaatctcgcatta
1321 atcagaaaaataaattaaatgtagtcactaattacataaagagtgcttgcttctaaaaa
1381 cttatataaatacatctcataaaatatggtatttaattaactataataaagtcactgt
1441 atttatcattaatatagcaaaccttgctgtcaaaatagtgccggacgccataatattattt
1501 agcggcaatgtatgttgctgcttatggtctgttcttttttttctttgtcgttggtga
1561 atatatatcaacctgccaccacttttgcgagctcgctcgagaagtgattattttcgac
1621 tccccctcgcgcgcaataaaaaaaaaaaaaaaaaaattgcaggcgagagagggttgag
1681 acaataacgacggtaatggcagtcgtaacgcgacgccattagcgataaatatttagtc
139

```

1741 gtataaagttttctagtgctgatataaatattcttctccggatttgaaaaataagGAGT  
140 Y Y R C T H H T C I V K K Q V Q R L S K  
1801 TACTATAGGTGCACCCATCACACATGCATCGTGAAGAAGCAAGTGCAAAGGCTATCGAAG  
160 D T S I V V T T Y E G I H N H P C E K L  
1861 GACACGAGTATTGTGGTGACCACGTATGAGGGAATCCATAACCATCCTTGCGAGAAGCTG  
180 M E T L T P L L K Q M Q F L T R F \*  
1921 ATGGAAACCCTAACTCCTTCTCAAGCAGATGCAGTTCCTCACTAGGTTCTAAtttggtt  
1981 taagtttaatacctagctacttacatgattatgatattggaatgtttcatcaacgacaga  
2041 acccgaaaagctcagtcattttatggtggtatatacgtttctttttgtaaattgaaatgt  
2101 caaattcgtggttaataaccgcaagatcaataaattttatgctttttatagtacttctcg  
2161 gaaaatctgcaatcttttgttcaccttagattctttgacgtgtattaattaatcgggaa  
2221 tagaaatac
