# Supplementary material for: Gene Structures, Evolution and Transcriptional Profiling of the WRKY Gene Family in Castor Bean (Ricinus communis L.)
Source: PubMed Central journal article supplement (PMC4743969; doi:10.1371/journal.pone.0148243), 2016-02-05
Supplement: pone.0148243.s008.pdf [file pone.0148243.s008.pdf]

**S8 File. The gene model for *RcWRKY20*.** The coding region is marked with uppercase letters, above which is its deduced amino acids. The transcribed untranslated regions, including 5' UTR, intron and 3' UTR sequences, are marked with lowercase letters. The start and stop codons are blacked and the sequences of the first intron and the first two exons that were not annotated previously are boxed.

```

1 agccacctctcagtcctcatgttaaaccaaggattatttgaggagcaagagattccttctac
1   M G F F S L P Q N M S F P Q L G S C H
61 acagATGGGTTCTTTTCTTACCTCAAACATGCCTTTCCTCAATTGGGTAGTTGCCA
20   Q S L K G I F T I P H S L A V D A P S S
121 TCAATCTCTTAAAGGCATATTCACTATACCTCATTCACTTGCAGTTGATGCACCCTCTTC
40   T A N L T E I L L S S S S S T A T K Q R
181 TACTGCTAATCTCACCGAAATCCTACTCTTTCATCATCATCCACTGCTACGAAGCAAAG
60   D D F T S N F G G P H L L S L Q R S S A
241 AGACGACTTACTTCTAATTTTGGAGGACCCATCTTCTTCTCTGCAAAGATCTAGTGC
80   N L W
301 AAATCTCTGgtaaagataatacactttttacaaacacaatcatgcaaaaaatacctcct
361 ttttcagttttcatggttttatcactttttttctttattctttctctctattttttatc
421 acttagtttaaatataactagctagattatattcctaacttcgtttcccaatcaatgaa
481 atataagtcatactagatctcttaattttaatggaattaataagatattcaatttatgaa
541 tcttcataattttcatgcatgtaccctctccctttcactatacatataatgaagtgaata
83   A W G D V N E C L S N K R
601 tttattggaattgttttcagGGCATGGGGAGACGTAATGAATGTTTAAAGCAACAAAAGA
96   S S V E D D H H H H H L G I S T M K M
661 AGCAGCGTAGAAGACGATCATCACCATCACCATCATCTAGGGATTCTACAATGAAAATG
116 K K I K A R R K V R E P R F C F K T M S
721 AAAAAGATAAAAGCAAGGAGAAAGGTAAGGGAGCCTAGGTTTGCCTCAAGACAATGAGC
136 D V D V L D D G Y K W R K Y G Q K V V K
781 GATGTAGATGTGCTTGATGATGTTACAAATGGAGGAAGTACGGCCAGAAAGTGTAAG
156 N T L H P R
841 AACACACTTCATCCCAGgttagacattcaaatctaataaaatttcaaatcctatatatgt
901 atttgttttctagcttttcttgatcttcttgttctgttggtgctgtttttgtgtacccc
961 atatacacatgctatgctcctcttccctttctctctctctcacatttttttttcttt
1021 ttctttctgtcgttctcattattatcggtgttatgattattgttataggcttttacagac
1081 ttggtgcaggagattttgatggataaatgtgtgtatataatgtgtgtgtgtaataata
1141 atcattatttgataataaaaataaattgaagaaagtgccaaaaagaagtaattattatg
1201 gctttcaaaagacaaaatcgcaattgtgaagaaagtaagaaaaggaaaaataaaaaaagt
1261 gctaacaattgatcaatcataatgtcatgtgtaaagcaagtatgacataatattcttga
1321 atcaaaaatgaaagttagacaacagcataatatcttgatacacttttgattaaacttgg
1381 aatcatataagaatgattccatagcgaagatatgatgagattatgtctataatattgaat
1441 gccgagtttagattacttctcatgatagttgaggttcttgtgtatgtaaaatgtgcata
1501 actagattcttgtatttaacttgaaaaatgggtataaatgttttaccaaaaaatatggt
1561 gaattacaatacactttcatctctccgagaacaaggaaaagagataaccatttgcttgtct
1621 gcgtttatgaccaagagaaattcattgatagacaaagtctgctctaagtaatgtgacat

```

1681 aataatttgacatgactcattttttatttagatgtgtctatgaagaatgccaaattggagaat  
1741 ttctttccaatcccagaatgttataatcttaggatttataacaagagaggtggactttta  
1801 gatttagcagttctttgacaatcttgtaatatagagataaaagattatthaagatatact  
1861 ttagagttttccatctgaacttttgacgtgtacaccgcaacaataagagagtgacatgt  
1921 gtatatgagatatttagactttgacatttgatgattgatataactcaatttatgctaag  
1981 catatatcagtttagtgtatagacgagacacacctaactagacaagaatttcccaact  
2041 attatgtgtctggccgggaattgcatgttcatgtgtcagtaacaacatagaacgtgatg  
2101 aggcttattgctcataatgtccattaaaattctacagcaatgatttcagctttttgaatt  
2161 tgtaaaatcttgcagatattataaatgagtagcttgcattgtttgtgtcttgcagtg  
2221 atgtctttcttgtgagcatggccacatatatagccaaagtcaaaaagtggggatcct  
2281 agttttcaaaaatacaatttctccaactagtggtacccttaccacttggttagagt  
2341 ttaactatagttttgagcaatacatgcatctaaggccacatgcatctagaactcttgt  
2401 actattatagtaaaattgcaattaatagaagacttaattaactgaatactattagtt  
2461 aaaaaagacaaaataaggacaaaataactaaatggattagtgggtaatgctgatgtggct  
2521 tctaacaaaagacagtaataataaggataaaattcttacctgtaatagttaaacaaac  
2581 ttctaataattgacaaggttagaaagaaaggaaaaaaagaaaaagagaagaagat  
2641 tacatagaggtgctccttgcacttttctctgtttcttttcttctcctcattt  
2701 gtgtttgagcagctatatgctattattgaggaaattaactttcagttatcacgctcaa  
2761 aggtgtgtacgtaaagttctttgatcattatgatttttacagtgcatggacttggtg  
2821 atacctgcagtaaaatattgtcagtggtatataatataatgtaccttctttattca  
2881 ggggtaaatatataatataatataatataatataatataaacaattctccaaaacatg  
2941 aactaaaatgtgtttgattagtgagaactttttggcaataataattcaaagttttgaac  
3001 agtagcctcccatcatttcttcatgttgaagaacgaacttagtttcatattgaattaa  
3061 gtaacaaaagcacaacactagatgcttgagtcagagcaacttaaaaaaaaaaattatttt  
3121 tacccaattggtgaatttcacatacttttggtagagatagatcatgcgggaaaatctgat  
3181 gtcaactaatatagacaaaatcaatgataaaagtattaaaaatagtgttgaatcttgaat  
3241 ctttttttcttcttaaaagtagataggttagcatgtagaagtagtagtgctgta  
3301 gaaatgagacggggaattcttttttataaagtgaggaaataagccattataattataatt  
3361 ataattaaaaggagagctcttcgatcagacctcaacttccgatgtaagcgtctggtt  
3421 ttaattcatataactttataacttgccctgtttcttaacttttatataactatag  
3481 attttttctacacattccatcctgtgatacttgccctctctaaaaactaacttgctc  
3541 tggccctgaacacaaggatcattttttatataatcttgtgctacttctttatgttca  
3601 tatcgtgtgatttaagttacagtttccatagagaattccatgcagttaattaacttctc  
162 S Y Y R C T Q D N C R V K K R  
3661 tggtaacaaaatccagGAGCTATTATCGCTGTACACAAGATAACTGCAGGGTAAAGAAACG  
177 V E R L A E D P R M V I T T Y E G R H A  
3721 AGTGGAGAGATTGGCAGAAGATCCAAGAATGGTGATAACAACGTATGAAGGGAGACATGC  
197 H S P S H D L E D S Q A Q S Q L N N F F  
3781 ACATTCTCCATCACATGATCTCGAAGACTCCAAGCTCAATCCCAGCTTAACAATTTCTT  
217 F \*  
3841 TTTCTAGttctctttgtgttttttcttttcttttcttttaattaaagattacttgatt  
3901 cccaatagtttggagcttggtagtaaatgtgctgcttgtgtaagagctttccattat  
3961 tatgtctttgattaataactacttactgtgttcaaggcatgtaaaaaataaacagtat  
4021 atccatgaattcatatagggcgcatttctaaggcttccatttcca
