# Supplementary material for: Gene Structures, Evolution and Transcriptional Profiling of the WRKY Gene Family in Castor Bean (Ricinus communis L.)
Source: PubMed Central journal article supplement (PMC4743969; doi:10.1371/journal.pone.0148243), 2016-02-05
Supplement: pone.0148243.s009.pdf [file pone.0148243.s009.pdf]

1621 tgtgtcagccattcaagcttcttttaacattggtgggagagtcaggagcaatacttagc  
1681 cttcgcaagtatcaacaacatctcgttcttttcttaaaaaaaaaagaagattaattcttg  
1741 catttatataacctatgcaagtggtctattgcaaagtaaatgctgagttgagcgaatcccc  
1801 tctccagagcatgaagtatctttcctatttgaaaattctgagaattcaaatgcctttgcc  
1861 taagttcttgccgtagtgaagaaaaagaagcattggaaaagaaaattgcaattggagtt  
1921 tattaataatattattcaaaagagacattaatttgaagggaaaactcatgcctagccttg  
1981 atgtatccatacactaaaaattgatagataattgatacatattcattaattttaaatata  
2041 acatgtgtcaatcctccaattttaaaatataaaaatacaaatatatacgtattattctctt  
2101 actaatattgatatacaccaagctagataaaaaattctcacaactaataagagagtg  
2161 atacatatggatgagtattttataatttgatatgagatgactgacacatactatattaat  
2221 taaaactaatgaatatatacaattatctatcagtttagtgtagatgaagacatacat  
2281 taaaactgttttattaggtttttgtacctgtcattgcaactacaataccgcaagtggat  
2341 ctgagaattagagaagactgaaacaggagctctaaaagctgaagagaaaatgaaaaatcta  
2401 ataatagttttatgtagtaccgaagatgagatccgaattataatgcataagaaaaccgaa  
2461 tgtataagaagtctatgtgaaatctcaacaaaatggtaggtacaagacacactgacatt  
2521 atagaagacatttatctgttttaagataaatagattctttaaatagggatttgaaataat  
2581 tccacatgaaactaatcattaacttggattttgataactaatcacgttacaatattttgac  
2641 agttgcttaaccatctaccgtcattgaaattgtagaatctgtttcactaatagcattaca  
2701 tacaagaagaaatttacgttgctctcattttctctgcttacttctcttatctcattca  
2761 gtttagttgacccttatatacacacttgcaattcgttgagaagttctaaacgaagagt  
2821 tctgtttataggcatctctacaggtagacgnnnttttaatatcttatattacataag  
2881 cattatgagatccgttgcatggaatggataaaccttaaaaaattagaaaggttaaaa  
153 S Y Y R C T H S N C  
2941 ggttttcttatattctgaatgactagcagAAGTTACTACCGATGCACCCACAGCAATTGT  
163 R V K K R V E R L S E D C R M V I T T Y  
3001 CGAGTAAAGAAAAGAGTCGAACGATTGTCAGAAGATTGTCGAATGGTGATAACAACATAT  
183 E G R H N H S P C D D S N S S E H E C F  
3061 GAAGGTAGACACAATCACTCTCCATGCGATGACTCAAATTCATCTGAACACGAATGCTTC  
203 T S F \*  
3121 ACTTCTTCTGAtagttgaatttttattaaattataaaagaacattggttgaattatta  
3181 taatgtgtagccagcttgtg
