# Supplementary material for: Gene Structures, Evolution and Transcriptional Profiling of the WRKY Gene Family in Castor Bean (Ricinus communis L.)
Source: PubMed Central journal article supplement (PMC4743969; doi:10.1371/journal.pone.0148243), 2016-02-05
Supplement: pone.0148243.s011.pdf [file pone.0148243.s011.pdf]

**S11 File. The gene model for *RcWRKY25*.** The coding region is marked with uppercase letters, above which is its deduced amino acids. The transcribed untranslated regions, including 5' UTR, intron and 3' UTR sequences, are marked with lowercase letters. The start and stop codons are blacked and the misannotated sequence of the first intron is boxed.

```

1 ttttttcaaaaatgtctttgatttgatatTTTTatgattctgtttgaattatagcaga
61 cccaatcctatcaattaattgctggtaaacaatTTTTgggaaataaaattaaatag
121 agtttgtttcttaagtttgaaggcaaacgtgttgagaacattccttgttataataacc
181 tgccatagtagaaagcagcagcaatctcaaagagaactccaaaatttactcaaagcattc
241 cattcttgataaacagtttctttataatccggttagcagtcagcattggagaaatgaacc
301 caccactataccttacaacacatgcacttgcaaagttacaaatatatatagtaaataa
361 acagatggtgattattgataagactcttttcaaaattaaattggtgaagcacatttatat
421 ttgctatTTGaatcggttgcctcagagtgaattcataagtgaatgTtaaaaaacaataag
481 gaaaatcaaaatcaacaatatagacattgctaagcatcaatatgatttttctaagtctgtc
541 tctcttgcagaaagtatccactatttctattcatgcgcgtggggcgcccttttctct
601 tcccttcttcatcttcttctgtccctcgcttaaatatcacctctgtactatttttgc
661 agctgacgccttttacttttctaacttatctctattttctttttctttttttctctgc
721 ttaaaaaaacggaaataataaatttaagtactgactgacagacacaccttcagaact
781 cttcaaaagaaaaaagaaaatTTTgaaaactacgcgtccttccaacacaacaacaac
841 gaacttctttcttgcacctcaaaacctaacctctctctctctctctctctctctctct
901 atattcattctgtttaactTTTTatcttttctaaaactcctctcagttctcagtcattt
1 M D D K D N T G D D
961 caaatcccaatcagtagatctctgggttccATGGATGATAAAGATAATACCGCGATGA
11 F V T D S T W T L G P D S D G V S Y F F
1021 CTTTGTTACTGACTCCACCTGGACGCTAGGACCTGACTCCGATGGCGTCAGTTACTTCTT
31 A T E R E S S I L S E F G W N L H T S E
1081 TGCAACCGAGCGAGAGAGCAGTATACTCAGCGAATTCGGATGGAATCTTCACACCAGTGA
51 P E R L D E L D P I Q S Q N T A D L A G
1141 ACCGGAACGGCTCGATGAACTTGACCCGATACAATCTCAAAATACAGCCGATTTGGCGGG
71 N L R F A P E S S S S S S V L Q G S V P
1201 AAATCTTAGGTTTGCACCTGAGAGCAGCAGCAGCAGCGTGTACAAGGATCGGTACC
91 T G R D T R T G T A I P G S G G G D A S
1261 TACCGTTCGCGATACTCGTACTGGTACGGCAATCCCTGGCAGTGGCGGTGGCGATGCTTC
111 T S N P S I S S S S S E D P P D K S A S
1321 GACTTCGAATCCATCAATATCGTCAAGCTCCAGTGAGGATCCGCCAGATAAGTCCGCGAG
131 S V G K P P E I P
1381 TTCCGTCCGGAAACCACCTGAGATACCgtgagtagtgatatacagaaattgaaaaatta
1441 gctcgaatctcgaggTTTTgcacttaaaataatggggataaaatcaagaaacagttgcag
1501 aactcggtcctttctgTTTggagagagggagagtcaatTTatgcgtccgtacactctac
1561 aaactgtcaaaaaaatttggttttagctcatgcaagttggggaggagaggtagtttcgta
1621 atttatcagaaaaatagggttaaattgggataatTTTTctcgaacaaaaggggcattttg
1681 ctaagagaaaaaagaagacagagccctcgaaccgccgttattgcggcggggaatggcgt
1741 gctcttaactTTTTtaacacgaactTTTaaattctctttttctttttctcttttcggttt

```

1801 ctaattctattagtaacacaattataaagctgaatatatacagcagaaggaaaaaagaag  
1861 ttcccttgatacttgTTTTATTAGTTTTTTGGTCGATATCTTCAAGAAAAGGAAATA  
1921 ttgtaggagatattctgttatgctatgtttgTTTTTTTTTTTTGTTTTAAATTTAAATA  
1981 aatcaattgatgcttgTTTTATGTTCTAGATTCATCCCTTTGGATAGTGCTTTATACAA  
2041 ttataatcattttgaatgcaatacgtgctgcaagttgcacgacacacacaaatgcttca  
2101 ccgtattgaatctcattttctattttcggTTTTCTTATTCTGCATGAACATATTCTATGT  
2161 gcattactatcactgcatatgtactattTTTTCTTGAAAAACTATATTCTACCCGCT  
2221 tccagcattgcatataaatgtcattcaatccttacctatattatttttggccatgag  
2281 agattagTTTTCTTTTTGTCTTTCCCTCATTGGCTTTACATCATATCATTATGATGAT  
2341 attttgcactagtttctagatttgatttgatttgatttttatttttcttatgttcatg  
2401 gtcaatgccactgTTTTGCTCATTGTATTGCCCAATGGGCTAGGAAATAGTCTTGATGAA  
2461 ggatgtccatctctgtgcaactcagatgttgcttcgttgttccatctccatgacgttctct  
2521 tttatatccagggaaaaataaaaaagaaccaaccattagtcctattttggcattaacct  
2581 tttttccaatttcaatatcttaaaatcttctttcagctagccatctggactgcaactgatc  
2641 ttattaggaacagcgagagaaatgtagttaccttcggaaagataacatgaagtgcacaa  
2701 tcaattttctagcaacatggacacattattttactgctacacttgggctTTTTTTTTTTC  
140 S K G K  
2761 agaattttattttgatttttcataattgtaggtgaaatattttgtagGAGTAAGGGCAAA  
144 K K G Q K R I R Q P R F A F M T K S E V  
2821 AAGAAGGGGCAGAAACGAATCCGACAACCACGTTTTGCGTTTATGACAAAGAGTGAAGTT  
164 D H L E D G Y R W R K Y G Q K A V K N S  
2881 GATCATCTTGAGGATGGATACCGTTGGCGTAAATATGGACAGAAAAGCAGTAAAAACAGT  
184 P F P R  
2941 CCATTTCCCAGgtctgcagttaatctacttttattaatttctattgtcccaaaggtatct  
3001 acatttcctttcttccattgtcttcatcattttctccagcaacgtctatctaaagtttcc  
3061 aatcaatcaattctactataagtagttctactattaatgatattagatataaagtcgaatt  
3121 ctattgaattgactcctttttactcaaatatggttctacgaattttcaatttactagaaa  
3181 ataaatacaataaataagtatatttgataaacatttaaaattcacttaacaaaggaaaagg  
3241 gcagcaatatataataaaacaaaaattggTTTTGCTTTTCAGAAAAGTTTTTTTATTT  
3301 ttttcgctttctaacttggtTTTTGTGTCTAACCATGTTTGCTTACAAAAGCTAAAA  
3361 acttttaaaaaatccgacaagaaaaacgaaagagcaagctaatcaaacgaagcgttaagaa  
3421 ttcattaacttctataattctatatttttcagccagttagaagaacttttagctttcatt  
3481 tcttttccacgttagtttggtgtgcattcatggataaattctcaaatgatctcaaggag  
3541 gatcgaaccctagttggaaggtaaagaaatcccttgactaaatggattaacactcttag  
3601 agttttggccatcactgtttaatgtttactacaaaattatatattttactggatgctaa  
3661 acaagttccatctaactctattttggaagattgtatatgcaaaagaaaagaccatattctca  
3721 tttttaagttcctgattcaaaatccgttgcttttaaatatttcttgaaagtggtttgat  
188 S Y Y R C T N S K C T V K  
3781 ttgacacataaacatttcagGAGCTATTATCGTTGCACAAATAGCAAATGCACTGTGAAG  
201 K R V E R S S E D P T I V I T T Y E G Q  
3841 AAGAGGGTTGAACGGTCTTCTGAAGATCCCACCATTGTGATTACAACATATGAAGGCCAG  
221 H C H H T V G F P R G G I I S H E V T F  
3901 CACTGTCACCATACTGTTGGTTTTCTCGAGGCGGAATAATTAGTCATGAAGTCACATTT  
241 V N H M T P P V S Q F Y Y T G I Q T P R

3961 GTTAACCACATGACTCCGCCAGTTTCACAATTTTATTATACTGGAATTCAGACACCTCGA  
261 E N P P T I T Q S Q Q T L P A Q T G E P  
4021 GAAAATCCTCCAAC TATTACACAATCACAACAAACATTACCGGCTCAAACCGGTGAACCC  
281 G T L R E P N R R G P T D E G L L G D I  
4081 GGTACACTGAGAGAGCCAAACCGGCGGGCCCAACAGATGAAGGACTTCTTGGGGACATC  
301 V P P G M R N R \*  
4141 GTGCCTCCTGGAATGCGTAACAGATGAacagagaattggtacattgcttgccttcctaat  
4201 ttttaattattaaacttgatccttttagtatctatgaatcttgcataagatagcatttcca  
4261 atcacttcatgtgtaattgacagagagagtttagtacattggactttcgactaaaggtaca  
4321 ctaaaatattaaatcattacgtatgtcactggaaaaatcagtagatgttatttttctt  
4381 ttttaatTTTTTgtagactcttaagaggcctgctcttgaaatctatgtaagaattagtta  
4441 atTTTTgctTTTTaaattaaagattaaactaattctgtgctgaatTTTTcacaataaatct  
4501 ctatataagtttatcaatcatgttaaatgataacaaaagatgttcatgagctgtcaaaaa  
4561 tgaaagaaaacgagtacgagccttagaattgttaactataagaataaaatcagattttag  
4621 ccatttagcgtcaaaacttaatttagctcatgggaagaataaaagctctaaatatagcaa  
4681 gatgcgtaatagaacttagttccactcatctgtatatgtagataaacctttgatgaggtca  
4741 gaagaaaaggagagaatccgatgtatataaccagtcaactactatagagtttcagcttcta  
4801 cattagtgacaagctagcgtctgaggcatgaatggttcttgagtgaactagctgatata  
4861 tatctgttagaaccacaggtatcacaccgcatatgtgacttatnnnnnnnnnnnnnnnnnn  
4921 nnnnnnnnnnnnnnnnnnnnnnnnnnnnnnnnnnnnnnnnnnnnnnnnnnnnnnnnnnnnn  
4981 nnnnnnnnnnnnnnnnnnnnnnnnnnnnnnnnnnnnnnnnnnnnnnnnnnnnnnnnnnnnn  
5041 nnnnnnnnnnnnnnnnnnnnnnnnnnnnnnnnnnnnnnnnnnnnnnnnnnnnnnnnnnnnn  
5101 nnnnnnnnnnnnnnnnnnnnnnnnnnnnnnnnnnnnnnnnnnnnnnnnnnnnnnnnnnnnn  
5161 nnnnnnnnnnnnnnnnnnnnnnnnnnnnnnnnnnnnnnnnnnnnnnnnnnnnnnnnnnnnn  
5221 nnnnnnnnnnnnnnnnnnnnnnnnnnnnnnnnnnnnnnnnnnnnnnnnnnnnnnnnnnnnn  
5281 nnntgaaccaatgctctacaaccctaaacgaaccagattcaagttaaacaaaatTTTTta  
5341 aatatatacattgtaagttatagcaatgattggtgaatcttttattgtagtcccaaaatt  
5401 tcgatatgattgcaatcattgaacttcattatgTTTTaatttacacattttatacttgag  
5461 agattgatacatcacaataagctgataacaaaaggtaggaaaaattataatataatta  
5521 aaacgaagataactaactaaaatgcaattgaagtttaataactaaaagaaagtttatgaa  
5581 taaactgaaactaaatgtaaaaattagttttaataattggtacaactaccctatgttat  
5641 acattctcttttagatattttgatctctctcttgacttggtgaaaactctttaattatc  
5701 tacatataccacgacaactgcacttctttctctaggtttagataaatgaaacataata  
5761 ccacaagctttaagttcatcgtagtaaaatatttaagcagggttttcttcaaagggtttt  
5821 ccataactcactcctaaactggccttggtcttgaagtattcaagtagtcatatcgcatata  
5881 tatacaattgttttctccaagcggggacatatcatgcttagaggcttccgcagagaat  
5941 tgtgtcactgtttgctgttttcttgggtatttgcacttttcttattagggagtgataa  
6001 atacagatattgttttagcatgattgaaaactctatataaccacttatattagattgta  
6061 tgagacaggtggctataccatgcgtctttttagcctatacattagtttgtgtaagaatt  
6121 gcagtacatggcttaatgttttgtgtccatatctgggtcgaccgacatgatcccatat  
6181 gtgtaaaggtggattccaagaaacggtgacccaaaaaattaatttcttatgctgccttg  
6241 tcaggagttaaaatcttttaaggtgcttgcttgatagaatataaccctttgtctcacc  
6301 cacctgtttttagcaaggcacgggtcaagtggtggaacattccctttatattttta  
6361 tctatagcatattcatgaagctacgttctatattttattcctcactattaagagaag

6421 ataaacceatztatgttttatcattcttatttaacctagccttcttaacacggtttacat  
6481 atgtatatatgtatgtatgggtgcagagaattcattttactttattgtggagaacaaaagg  
6541 agcaagccagaatcttagctcgaagtgagtcctcaagtcttgtatttatctcttgga  
6601 atagagtgcattgactttatacgtatctcacattgcagcaggtatcttcaattgattgga  
6661 tcttatatagaaccttttctttcaatttgcattttgaggatggcttgctgtatgtgt  
6721 aaatagctttcacagctgaaatattgttaacctaatctgcactcttttagttgagtc  
6781 gctctgaattcagagtgttttaagaggtctgtactatatgtaaagttgatgatataaatc  
6841 cttctttatttctaaatcaaatcttataatttgattcattaatcgtcctttttttctgt  
6901 ttgctttttgggtagctgtagttaattcatttctgtttgggagttcttctcatgggagg  
6961 tacgtgacccg
