# Supplementary material for: Gene Structures, Evolution and Transcriptional Profiling of the WRKY Gene Family in Castor Bean (Ricinus communis L.)
Source: PubMed Central journal article supplement (PMC4743969; doi:10.1371/journal.pone.0148243), 2016-02-05
Supplement: pone.0148243.s014.pdf [file pone.0148243.s014.pdf]

**S14 File. The gene model for *RcWRKY30*.** The coding region is marked with uppercase letters, above which is its deduced amino acids. The transcribed untranslated regions, including 5' UTR, intron and 3' UTR sequences, are marked with lowercase letters. The start and stop codons are blacked and the misannotated sequences are boxed.

```

1                                     M D S H S
1 accctctccttttctctaataactcaagtcttattaagtaaaatcatATGGATTCTCATTC
6 Y T K H K
61 ATATACCAAACACAAGgtaaactttcttacttacttcccttttctctcactcactgctct
11                                                                 M
121 ctctagctctgcatgtctgagttttttcttttttaaatcttatgtttcttctgatcagATG
12 E S L Q D E L E R T Q K E N E T L R F M
181 GAGTCTCTACAAGATGAGCTGGAACGTACCCAGAAAAGAGAACGAAACTCTTAGATTTATG
32 L E V M S R K F S T L Q A N F Q E K K V
241 CTTGAAGTTATGAGCAGGAAATTCAGCACCTTCAAGCTAACTTCAAGAAAAGAAGGTA
52 Q E T P S S S C Y E V Y E S N K R P R I
301 CAAGAAACCCGAGTAGTTCATGCTATGAGGTGTATGAATCCAATAAGAGACCAAGAATT
72 E I P L S K P S Q I F V R T D S K D K S
361 GAGATTCCTTTGTCCAAGCCTTCACAAATCTTTGTTAGAAGTACTCAAAAGACAAGAGC
92 L
421 CTGtaagcttacgttcttttactttgaaaaaaaaatgcatgtttaagccttgattcagg
93                                     I V R D G Y Q W R
481 ttttcatttagttctctttttggatttggtgcagATTGTGAGAGATGGTTATCAATGGA
102 K Y G Q K V T K D N P S P R A Y F R C S
541 GAAAGTACGGCCAGAAGGTTACTAAAGATAATCCATCACCTAGAGCTTACTTCAGGTGTT
122 M A P G C P V K K K
601 CCATGGCCCTGGTTGCCTGTCAAGAAGAAGgtatgccattcacaagctttatttctct
661 ctctctctctctctctctctctctctctctctgtttaattagggttcaattatgetaggget
721 tgaatttcatagcttagagatgacttagtaccactgagtcaaactcatcgttattcacia
781 tgtttctttcaaggaagtaaaatcaaaattctccgactattattttatgaaacatgcatg
132                                     V Q R C
841 actaattaagaccgagtgtaaaagtctgtttcttgggttttaattagGTGCAAAGGTGT
136 A E D K S I L V A T Y E G E H N H E P N
901 GCAGAAGACAAGTCAATACTAGTTGCAACTTATGAAGGAGAACAACCATGAACCCAAT
156 D S P A Q S V Y S P D S S S R S S R T T
961 GATTACCTGCACAGTCTGTATATTCTCTGATAGTTCATCAAGAAGCTCAAGGACTACT
176 I S F Q P A A V G L D L T L S S S I H D
1021 ATTTCTTTTCAACCAGCTGCTGTTGGCCTTGA TCTTACTCTCTCAAGTCCATTCATGAT
196 K R R N F L R V S R K T T N A A T S I V
1081 AAAAGGAGAAACTTTCTCAGAGTCTCAAGGAAGACAACAAATGCAGCAACTTCAATAGTG
216 V R L K N M W H L S P K I P T L L L L W
1141 GTAAGGTTGAAGAATATGTGGCATCTCTCACAAAGATCCCAACTTTACTGTTGCTGTGG
236 L L L L Q G L *

```

1201 CTGCTGCTGTTGCAAGGTCTATGAgtggccagctatatagtccaagactactgtgaagat  
1261 ctcggtaccttatgttatcatgtatttcacttttagatgtaaaggaattgatgaacaaga  
1321 tcaattagcttttttagctattcttcgctggccacttagtggtgcatgtaactttgctta  
1381 tgcttcgagctactgaatatgag
