# Supplementary material for: Gene Structures, Evolution and Transcriptional Profiling of the WRKY Gene Family in Castor Bean (Ricinus communis L.)
Source: PubMed Central journal article supplement (PMC4743969; doi:10.1371/journal.pone.0148243), 2016-02-05
Supplement: pone.0148243.s015.pdf [file pone.0148243.s015.pdf]

**S15 File. The gene model for *RcWRKY35*.** The coding region is marked with uppercase letters, above which is its deduced amino acids. The transcribed untranslated regions, including 5' UTR, intron and 3' UTR sequences, are marked with lowercase letters. The start and stop codons are blacked and the misannotated sequences are boxed.

```

1 ttgagatggagtctccccatccactaacatTTTTATGAGAATTATCATCTGAATTGCAAG
61 ggaaagggctacgtcaaattatgtaagacatTTTCAAGAACCTAATGCATGAAATCTGA
121 gaatgttaccagtaaatatcatgccctaaaaacttcaggcggccaaaaaaaaaagcagt
181 cgcaggatctacatgaaattctgagaatgttaccattgaggtaacggcggctatttaa
241 tttgaccaagcattggctgtttacacatatatgaatcttgaacatgactactggttcaag
301 gTTTTCTCTTTCTACATGCACAAACGTTGAAATTGAGCATTCTTTCTTACTTTTAA
361 caaaTTTTCTTTCTCAGAACCTCAATTAaaaaaaaaaattcaataagaaatgatgacct
421 tctctctttggagtatatgtgtttgacatTTCTCAACGAGAGTAACATGCATAATAGATA
481 agtactcgagtttgaatatctatTTTCTTTCTTTTAAAGTATAAAAGTCAGAACTGGA
1
M A N K
541 ggctctattatgtgtatataatgaccagcctagctactaaatgggcatATGGCAAATAA
5 R I S S I S M E T D K S G S L E K P D H
601 AAGAATAAGCTCAATATCTATGGAGACCGACAAGAGTGGTAGCTTGAGAAGCCTGATCA
25 C A N T A A V Q E E K K M K S S G D D E
661 TTGTGCAAATACTGCTGCAGTACAGGAAGAGAAGAAAATGAAATCAAGCGGTGATGATGA
45 E V V V A E I N K
721 GGAGTTGTTGTTGCAGAAATCAACAAGgtgattatgtcttttagttaattagacctgag
781 tgcattggaagatTTTAGATATGTTTATATGCTATGTGTTCTTTCTTGGGAAGTTTT
841 tcttgtcttgttgattagctttccatgcataggaatccacaaaggaactaaaagattta
901 tccattaaaaagaagaagaaaaatctccaaatgaaatcttcttttcttccacttaaat
961 tcttggaaatacacatagcgaatgatttgtctTTTTTGGATTAATTAATCTGGTATCAT
1021 atacttatagTTTTCTCCATGACAAGATCCACTTTCTAGAAAATTAGTTTTCAAGTTCA
1081 tccattaatgactcttccatgTTTTGACTCTTTGCTTGAATATTGATTTTTCTAATTTCT
1141 ttttcagtaatacacaaaaatgcttttgaagcttatgtatattgaaatgaaatcattat
1201 tcacgttatttcagaaatatttatcttatcaagcaatattcatgtTTTTTTTCTCTTT
54 E E G D V N H V I N I K Q E E
1261 ggtgtatgccatcttagGAAGAAGGAGATGTGAATCATGTGATAAAATATTAACAAGAAG
69 N I R K R P S S T M N K D L T S I N H
1321 AGAATATCAGAAAGCGGCCTTCTCCACGATGAATAAAGATCTTACTTCTATCAATCATg
1381 taagaatTTTcatatacttgttttgTTTTATATGTAACACCTTAATTTTTCTTTTCACT
1441 attattactTTGGTTGTTGGCAAAGACTTGTATGTAAGAAAAATGTGTTCTTCCACTC
1501 atatgtgcaagttgatctataacatattaatagTTTGATTATTCTTATAATAATTAAGT
1561 tcaacttaatTTTGAAGAATTTATTTGATAAGTTTTCTTAAACTATTGAGTTGTTCAAC
1621 caaatgatggtagaccaattctgtaaatcctaattgaatattaattattgaggagtt
1681 ttgctttcaaaagatgatcactgcattattaattgatctattctaaacatTTTGTGCTA
1741 taccgagtcaaacattgttcacaaatccaccatgaagatcagatctcctcttaattagt
1801 catttgcagaaattgactgagatctattgttattattttatcttcattatatatattcta
1861 gttagtacctTTTCTTTTCAAAAAGAAAATCATAAAAGCACTCAGACTGCATAAATTTG

```

1921 aattccttaaatataaagtagtattgggtttattggttatggtcttaatttctagtcttga  
1981 ttcccttgcttggttttacaatttttagtttgattttgattattgtagtctgctattttgt  
2041 ttctcattttcaatgtgaaattttgctgcccatattttacaagtagccacttcatgatta  
2101 gaatattatctcaataataattattcgatgccatattatgtaactaaacctatagaattc  
2161 agatgttacatttttctgaagctcttagttaagtcgtgtagtctggagatggactaactc  
2221 aatgcaagaactttcccaaagattactattattattattttttattttttagaagtctt  
88 E D Q L R S T K A K  
2281 aatcatttagttcacttcttttgacaccagGAGGATCAGCTGAGGTCCACAAAAGCTAA  
98 I G E V K E E N E R L K Q L L S K I L N  
2341 AATTGGTGAGGTAAAGAAGAGAACGAAAGATTAACAGTTACTATCCAAAATTTTGAA  
118 D Y Q S L Q K H F C K V V Q E E E E K K  
2401 CGATTACCAATCTCTACAGAAACATTTCTGTAAAGTTGTTTCAGGAGGAAGAAGAAAAAA  
138 P A K L T T A H Q K N Q E P E L V S L S  
2461 ACCCGCCAAACTAACGACTGCCATCAAAAAAATCAGGAACCAGAGCTCGTCTCTCTCAG  
158 L G R S S S S E P K K E E K K S S N L S  
2521 CCTTGGTAGAAGTAGTTCAGTGAACCCAAAAAGGAAGAGAAAAAGAGCAGCAATCTAAG  
178 D G N E D D E L N N K G L S L G L D C K  
2581 TGATGGGAATGAAGATGATGAAGTGAATAATAAAGGACTTTCTCTTGGTTTGGACTGCAA  
198 F E P D S S V T V K N N A S S E N S F D  
2641 GTTCGAGCCAGATTCATCTGTAAGTGAAGAATAATGCAAGTCCGAAAATAGCTTTGA  
218 E D P K E E E P T E T W S P N K I R K T  
2701 TGAAGATCCAAAGGAAGAGAACCTACTGAGACATGGTCACCAAAACAAAATCAGGAAGAC  
238 T I T P D D E A M Q Q N Q I K K T R V S  
2761 AACCATAACTCCAGATGATGAAGCGATGCAACAAAATCAGATCAAGAAAATAGGGTTTC  
258 V R A R C D T P T  
2821 AGTCAGAGCCAGATGTGATACTCCAACGgtagcatctaactttttatttattatataatca  
2881 tgcactggaatgcatgcatgtgcgcatcaaaaaatactgtttaagggttaactcagttg  
2941 gtacttcttattttacgtgattgttttcaaattctgagattggatcattattagagatta  
3001 attttcttacttgtggtctcaatgtaaatgatttgactaattggtaaattaaaaaaaaa  
3061 agtaataggaatattttcatattaagaaaaaaagtaatgaattgttttttcaatgaatt  
267 M N D G C Q W R K Y G Q K I A K G  
3121 ataatacagATGAATGATGGATGTCAATGGAGAAAATATGGACAAAAGATAGCGAAAGGA  
284 N P C P R A Y Y R C T A S P T C P V R K  
3181 AATCCGTGCCCTAGGGCTTACTATCGTTGCACAGCCTCACCAACTGTCCAGTGAGAAAA  
304 Q  
3241 CAGgtatgttttctgcatgccattgttgacatttcaatgattaaaatattttgtttggttt  
3301 gtttgaaccatcgatatatgattatgtccttagctacaaccatcaatttttagtagaaatta  
3361 cagtcaaatatgatgacataatgtacttagaaaatagaacttttaggagattatttattta  
3421 acatcaactgtcatcatatggaaaagtgaagaatgcatcatatataatgtcggaatatac  
3481 aatataatgtataagtttttgacatattgttagaaaatacgtaccatcaactaatgctc  
3541 attacttgacatttgatataagataaaagattatattttccaaaatctagttaagttgct  
3601 ccaatgtaaatttgatttttatctcgtactatttgaatcaacacatgtaaaatgatttac  
3661 ctggtacaaatgataatttaattatacgaactccgactttggattcagtttctcatg  
305 V Q R C A K D M S V L I T

3721 cagctttttcttgaatttcagGTGCAAAGATGTGCTAAAGATATGTCAGTCTTGATCACC  
318 T Y E G T H N H P L P L S A T A M A S T  
3781 ACATATGAAGGAACCCACAACCATCCACTTCCACTTTCAGCAACGGCAATGGCTTCCACA  
338 T S A A A S M I Q S R S S T S A Q P G S  
3841 ACATCTGCAGCTGCATCCATGATACAGTCAGTTCATCAACATCAGCACAGCCAGGCTCA  
358 S I S A P S S I S T S N G L N F S L S Q  
3901 TCGATCTCTGCACCAAGTCAATCTCAACTTCAAATGGACTAAACTTCAGTCTCTCCCAA  
378 N S R P Q Q I Y F P N S S I S T S N S H  
3961 AACTCAAGACCCCAACAAATCTATTTCCGAACTCTCAATCTCAACTTCCAATTCGCAC  
398 P T V T L D L T T A P S T T T A Q Y F N  
4021 CCCACTGTTACTCTTGACCTCACTACTGCACCATCCACAACACTACTGCCAATATTTCAAC  
418 R F S S A P R C L N F S S S P S S T S L  
4081 AGATTTTCTTCTGCTCCAAGATGTCTCAACTTTTCTTCTTCCACATCATCTACTTCTCTA  
438 D Q S N I N T L Q S L W N P S S Y S T Y  
4141 GATCAATCCAACATTAATACTCTGCAATCACTATGGAACCCTCAAGCTACTCCACTTAT  
458 G T V P L N R N Y V E K Q P T P G N H H  
4201 GGAACAGTACCTCTAAACAGAACTACGTAGAAAAGCAACCAACTCCAGGTAATCATCAT  
478 V Y Q P Y M H I I N S E T T P P P N Q Q  
4261 GTTACCAGCCATACATGCATATAATTAACAGCGAGACTACTCCTCCTCCTAATCAACAA  
498 S L T E S I A A A T K M I T S N P N F R  
4321 TCTTTGACAGAGAGCATTGCAGCTGCAACAAAGATGATTACTTCAAATCCCAATTTCAGG  
518 S A L A A A I T S F V G N N G G S T T T  
4381 TCAGCCTTGGCAGCTGCAATAACATCATTTGTTGGTAATAATGGAGGGAGTACTACTACT  
538 T T T T T N S N N S N N P G A G E H Y S  
4441 ACTACTACTACTACTAATAGTAATAATAGTAATAATCCTGGTGCTGGAGAGCATTATTCT  
558 G L N L K L G D H H Q S L A F N T L Y P  
4501 GGCCTGAACTGAAGTTGGGTGATCATCATCAGTCATTAGCATTAAACACACTTTATCCA  
578 S S N S N G I G C A S S Y L N K S A T S  
4561 AGCAGCAATAGTAATGGAATAGGGTGTGCTTCAAGCTACCTGAATAAATCGGCTACCAGT  
598 L S S Q Q G S L V L F P G S L P F S S A  
4621 TTAAGCTCTCAACAAGGGAGCTTGGTTTTGTTTCCAGGTTCAATGCCATTTTCTTCTGCT  
618 T R S A S E S P A N S R D H N K G \*  
4681 ACCAGGAGTGCTTCTGAATCTCCTGCTAATAGTAGGGACCATAACAAGGGTTAAaggatag  
4741 tacagagaaattaatatgtaaatTTTgctgcactttgTTtagctagatcgattgatattt  
4801 tctgtgtaaaattgtagagatgTTTccatattgtatttctgctacaaattgtacattgatt  
4861 tttctTTTTctctctaaagaaatttctggTTTTggactaaacttgcctatatatatata  
4921 tataacatgaccaataaataagtacggattataaatatatataagcaaaacaattaatt  
4981 gatataaaaggatcaatcaattcatgaagtttTttttcattagaatcaaattggatga  
5041 atgattcgacaagataaaatatagattattatacattcatcatttgatttgattgtccag  
5101 ctaaacataactaagagaagtcgtttatgaacaagccaattcaaacactagccgccaac  
5161 aatcaatttcatatatttgagatgttcagctgaataatccaggttgggcctaggctattg  
5221 atgctggttttctgcacaaaaaaaaaagaaaaaagttcagagagttgaacata  
5281 tatagtgttcacttcagcagcagctttaatgatcaatctgtaattaataattagggttt  
5341 tgaacggtt
