# Supplementary material for: Gene Structures, Evolution and Transcriptional Profiling of the WRKY Gene Family in Castor Bean (Ricinus communis L.)
Source: PubMed Central journal article supplement (PMC4743969; doi:10.1371/journal.pone.0148243), 2016-02-05
Supplement: pone.0148243.s017.pdf [file pone.0148243.s017.pdf]

**S17 File. The gene model for *RcWRKY41*.** The coding region is marked with uppercase letters, above which is its deduced amino acids. The transcribed untranslated regions, including 5' UTR, intron and 3' UTR sequences, are marked with lowercase letters. The start and stop codons are blacked and the misassembled “TCTTGCTCCAGAAGAG” sequence is boxed.

```

1  cagtgcacatgctttaaatcttacacagccgatgccatcattttgaccagactgcagagga
61  gaggaagaaagaaagactcttcgccctttctcttctcgtttatcaacagcctactccct
121 tcatttttctcttccatagctctgtctctgttctctctctctctctctctcttttcatg
1      M A V D L M M G Y S R T N
181 ttcttgtttcaccatcacagtgATGGCTGTTGATCTCATGATGGGTTACAGCAGAACCAA
14  S F V S K T M E E N A V V Q E A A S G L
241 TAGTTTTGTATCTAAAACATGGAAGAAAACGCAGTTGTTCAAGAAGCAGCTTCAGGGTT
34  E S V N K L I K L L S Q Q N Q D K L I H
301 AGAGAGTGTGAACAAGTTAATAAAGTACTTTCACAGCAGAATCAAGATAAATTAATCA
54  Q S S S S S S P P C S T M D I E I D C K
361 TCAATCATCATCTTCATCATCTCCTCCTTGCTCAACCATGGATATTGAGATTGACTGCAA
74  A V A D A A V S K F K K V I S L L G R T
421 AGCAGTAGCTGATGCTGCTGTGTCTAAATTCAAGAAAGTCATTCTCTTCTTGGTAGAAC
94  R T G H A R F R R A P V S T P L I S T S
481 AAGAACCGTCATGCTCGCTTTAGAAGAGCTCCTGTATCTACTCCTTTAATAAGCACTAG
114 Q D Q E N H H Q Y Q I L E S K V Y Y A T
541 TCAAGATCAAGAAAATCATCATCAATATCAAATCTTGAAAGTAAGGTCTATTACGCTAC
134 P I Q Q V P P P P P P P P P P P P P P P S Y
601 GCCGATCCAGCAGGTTCCACCTCCACCGCCACCGCCACCGCCACCGCCCTTCTTA
154 H D Y S S M V I M P K N N H N N S N N G
661 CCATGATTATCTTCTATGGTGATTATGCCAAAGAATAATCATAACAATAGTAATAATGG
174 V T N D R K E S S T T I N F S Y S S A A
721 AGTTACTAATGACAGAAAAGAATCGTCAACTACCATTAATTTTTCTTATTCTTCTGCTGC
194 N S F V S S L T G D T N D S K P S P S S
781 AAACATTCGTGTCTTCTTTGACGGGTGATACTAATGACAGTAAACCATCACCTTCATC
214 A F Q I T N L S Q V S S A V K P P L S T
841 AGCTTTCCAGATTACTAATCTTTCTCAGGTTTCTTCGCTGTGAAGCCTCCTTTGTCTAC
234 S S L K R K C S S E N L G S G K C G S S
901 TTCTTCTTTGAAGAGGAAGTGTAGCTCTGAAAATCTGGGTTCTGGCAAGTGTGGCTCTTC
254 G R C H C S K K R
961 TGGTCGATGTCATTGCTCCAAGAAGAGtcttgctccagaagaggtataactttctttcct
1021 tttagttaatcttgatTTTTATTTCAGCTGTTTCTGGTTAATCTTGATTTTTTTTTCTTT
263      K L R L
1081 cctaaattataaattaaatggatcttgatttttctgatttattatagcagAAAGTTGAGAT
267  K R V V R I P A I S L K L S D I P P D D
1141 TGAAGAGAGTGGTCAGAATTCCAGCAATTAGCTTGAAGTTGTCTGATATAACCACCGGATG
287  Y S W R K Y G Q K P I K G S P H P R
1201 ATTATTCTTGAGAAAAGTATGGGCAAAAACCCATTAAGGATCTCCTCATCCAAGgtaaa

```

1261 ttttcttaagaataaaaaatgatttcataacggttttgatccttgactagttatttaa  
1321 gactatgagaagaatataattttgataaattaagtgaattgggttgatcattattat  
305 G Y Y K C S S V R G C P A R K H V  
1381 gtgaacagAGGATACTACAAGTGCAGTAGTGTGAGAGGATGCCTGCACGTAAACATGTG  
322 E R A S D D P S M L V V T Y E G E H N H  
1441 GAAAGAGCTTCAGATGATCCATCAATGCTTGTAGTGACATATGAAGGAGAGCACAAATCAT  
342 T L S V A E T T N L I L E S S \*  
1501 ACTCTCTCAGTTGCAGAGACGACCAATCTCATCTTAGAATCATCATAGataatttaatca  
1561 tgaatccattatcatcatcaacagcaagagtgaatgaattagctccattgaagtttg  
1621 aaagtaagaaggtaggcaaatagttgtagtaatatttagtggtagtagtagtggtagct  
1681 tgtggtgtggaagaaggacaggactccagactttaaaaaaaaaaaaaaaaaagggcctc  
1741 tctgctttaattatctcgaaggagattatagtgagagttggttcatttcatttaattct  
1801 tttctctttgtaaaatattttggaattaatttgaattccttgatcctttttctttccct  
1861 tt
