# Supplementary material for: Gene Structures, Evolution and Transcriptional Profiling of the WRKY Gene Family in Castor Bean (Ricinus communis L.)
Source: PubMed Central journal article supplement (PMC4743969; doi:10.1371/journal.pone.0148243), 2016-02-05
Supplement: pone.0148243.s018.pdf [file pone.0148243.s018.pdf]

**S18 File. The gene model for *RcWRKY44*.** The coding region is marked with uppercase letters, above which is its deduced amino acids. The transcribed untranslated regions, including 5' UTR, intron and 3' UTR sequences, are marked with lowercase letters. The start and stop codons are blacked and the misannotated sequence is boxed.

```

1 tttttattaaaaactacttccactttgccatcactgtgaaattataattcgttagacatgc
61 acttttttgaatcgattgtttccctttttacaaaagtattagttttgttgaatcatttta
121 ttattaaacacttaaaccttgcaattttgagcatgatttgaataaaataaccttagtt
181 tctactccaccattttctgtcttcttcaattttctttcacettctctcatttttctctt
241 tttctttggatattgtttaatgcttgttttacgattatttcaactgtctattttgtatec
301 gaagctgccattgattatctaggcacttcttggatttgatcagctcacttagttgcttc
361 tgactcagcttatattgtcagaacatgatcattcatggctgtctagttcacttctttta
421 actacttatagctttaatttgccttcctataaggcctttatttataaggatcacgaagga
1
M A P R G D F K V H E
481 agcatcagcttcaggtgtatgtgtttcaATGGCCCCAGAGGGGATTTCAAAGTTCATGA
12 V A Q S S F R Q A H F L F T C I S D K N
541 AGTTGCACAAAGTAGTTTCAGGCAAGCTCATTCTCTTCACTTGCATTTCTGATAAAAA
32 Q K R S I Q E V S L I A Q G A V N E F R
601 TCAAAAGAGAAGCATTCAAGAAGTGAGCCTGATAGCTCAAGGTGCAGTAAATGAATTCAG
52 N L L T L L D G S T Q S D H P K R I K K
661 AAATCTACTTACTCTTCTTGATGGATCAACACAATCTGATCATCTAAGAGAATAAAGAA
72 G P L P L S S V K I N P V E L M D S P N
721 AGGTCCTTTGCCACTTCCAGTGTCAAGATAAACCCGTGCGAATTGATGGATAGTCCCAA
92 S M P L I M S S S G C N I R Q F F P L Q
781 TTCTATGCCTTTGATCATGAGTTCTTCAGGGTGAATATTAGGCAGTTTTTCCCCTTCA
112 T I Q S A G S V A P T N S F N L Y V Q K
841 GACTATTCAATCAGCCGGTTCAGTAGCCCCACAAATAGTTTCAACTTGTATGTGCAAAA
132 H K T K T N T D F R N S L V M N S S N P
901 ACACAAGACTAAAACCAATACTGATTTCAGAAACAGTCTGGTCATGAATTCATCAAACCC
152 S P L K P I R T S F L S L D D R S G K S
961 CTCCCATTAAAGCCGATAAGAACATCTTTTTTAAGCTTGGATGATAGAAGTGGAAGAG
172 K R S V G Y S S S E I M A S R D D F T M
1021 CAAGAGATCAGTTGGTTATTCATCATCTGAAATTATGGCATCTAGAGATGATTTACTAT
192 H S S K C K S E I K S E E T N S T K C L
1081 GCATAGTTCAAAGTGTAAGAGTGAGATTAAGAGTGAAGAGACAAATAGTACCAAGTGTCT
212 A S T G G C H C S K R R
1141 TGCCTCAACTGGAGGATGTCACTGTCAAAGAGAAGgtaaattctcatataatttggcat
1201 ggaaatgtttggttagatattaatggtagttctaatgtaatcttcttaattatgtgt
224 K M R I K K I I Q V P A T S S G K
1261 gatttatagGAAAATGAGAATCAAGAAAATAATTCAAGTTCCTGCTACTTCAAGTGGTAA
241 L A D I P P D D Y T W R K Y G Q K P I K
1321 ATTAGCAGACATACCTCCAGACGATTACACTTGGAGGAAATATGGACAGAAACCCATTAA
261 G S P Y P R

```

1381 AGGATCTCCTTATCCTAGgtatgtctgtatTTTTCTTAAATTTTTAAATGAATTGGTg  
1441 tctgtttgatcactaaaatgctttgatatttgccacttctcttggcaaggcacaaggtgt  
1501 ttaattctacttattttcttttggttagctgtgggatgggcttaggaaaataaattaa  
1561 caaaaggtaacaagaggcaactgcaatttaataagaatagccataggatagattcaccatt  
1621 ggacagtcaactggtccaaagtctagtctctgacctcatcaagaagccagcagttttagt  
1681 tcctgacatccccaaacatccctcaaacgatctaaccgagtttaactggaacaatcct  
1741 aaaagaggatgtcaaaactttactattagcctgtcctcttagaggcaccagtaaacaatgt  
1801 tagacatgggtgttatcttcactcggaccatccttagaataacagttcaagttgcgggt  
1861 tcttaaggtgccccatatttggtttcagtcaattctgggtgctgacatgtttatctttga  
267 S Y Y K C S S M R G C P A R K  
1921 taatttgttcgcgaagGAGCTATTACAAATGCAGTAGCATGAGAGGCTGCCCTGCAAGGA  
282 H V E R C L Q D P A M L V V T Y E G D H  
1981 AGCATGTGGAACGATGTCTGCAAGATCCGGCTATGTTAGTCGTCACCTATGAAGGAGACC  
302 S H S K I P L Q S P N I L I Q V \*  
2041 ATTCTCACTCCAAAATCCGCTCCAATCACCCAACATTCTTATTCAGGTTTAAcTaaagc  
2101 aaagcaagttccagtttcttggtaacaagcctgtgttgggtgtattattttcttgtgttt  
2161 ataagacatgtatgcttctctggtttatataattggaacttcaacttcagtaacagattt  
2221 ctacatctgttacgtgtatattcgctcttttgagagtatcttaatgatgttttagattat  
2281 g
