# Supplementary material for: Gene Structures, Evolution and Transcriptional Profiling of the WRKY Gene Family in Castor Bean (Ricinus communis L.)
Source: PubMed Central journal article supplement (PMC4743969; doi:10.1371/journal.pone.0148243), 2016-02-05
Supplement: pone.0148243.s019.pdf [file pone.0148243.s019.pdf]

1561 acacgcacctgacctaaatgaaataactgttctttgattagcacttgtctttagaatata  
1621 tcacatccctttcatcctgacaaataagccaaattaaggttttcttgttcaagaatggac  
1681 taatcatcattgtcattgctagcttaatcagtgattctcaaatttgatgaaattttgat  
1741 attcatcatcgttgtcatctcaaattctttttctttggcttggataatgtggaaaaggc  
231 K S Q A K K V V  
1801 aagaaataacaaaatttggattttgttccattcagGAAAGAGTCAAGCAAAGAAGGTGG  
239 C I P A P A A A N S R P S G E V V P S D  
1861 TTTGCATACCAGCACCAGCAGCTGCAAACAGTAGGCCAAGTGGAGAAGTAGTTCCTTCTG  
259 L W A W R K Y G Q K P I K G S P Y P R  
1921 ATCTGTGGGCATGGAGAAAGTATGGTCAGAAGCCTATCAAGGGTTCTCCTTATCCAAGgt  
1981 aagtgatgatagaaaaatttgtattgtcattctagtttaataactataaaaaagttcctaa  
2041 gacaaagaacaaaagctgaattcctccattccatttctttcctctgacatatattatc  
2101 cattgaaaaataaaaagaacatttcttcttcttttcttttttagatcttttactatag  
2161 gaattgccattatcttctgtttgagcatgaaatacaacaatttatatacatgtcttcaa  
2221 acaatgtcctgtagagtgcttcttgaccaactaaaatttccctagaaactgaattcaa  
2281 acaaattctttcatcaataactgatcatttagtaatatctttagaaatcagtgagggta  
2341 tttcaatttctttgttaattttcttttttgataaaaactctaggagagtttccaacca  
2401 ttgtgcagaatttgcattgagtgatgacatttctgtatttgaatggtttat  
2461 ttccctttctattgtcattttgactgttgaactcggacttgaataagtgaataactacct  
2521 aaaaacggcgataaattcagtgatcattataactaactaataactaactcatgtctcta  
278 G Y Y R C S S S K G C S A R  
2581 tatataacatattccagAGGGTACTATAGATGCAGTAGCTCAAAGGGTTGCTCAGCAAGA  
292 K Q V E R S R T D P N M L V I T Y T S E  
2641 AAACAAGTGGAGCGTAGCCGAAGTATCCTAACATGCTAGTCACTTACTTACTTCTGAG  
312 H N H P W P T Q R N A L A G S T R S Q P  
2701 CACAACCATCCATGGCCAACTCAAAGGAATGCTCTTGCTGGCTCAACAAGGTCACAGCCA  
332 P K N N A G S S K S S P T S H P Q K T T  
2761 CCAAAGAACAATGCTGGTTCTTCGAAGAGCTCACCGACCTCTCATCCTCAAAAGACAACA  
352 L N T K E Q K E S S N D T F S P S N M V  
2821 TTAATACAAAAGAACAAGGAAAGCAGCAATGATACATTTTCTCCTAGTAACATGGTT  
372 A A A S A S V K E E I E D I H E K H I M  
2881 GCAGCTGCCAGTGCATCAGTAAAAGAGGAGATTGAGGATATTCATGAGAAGCATATAATG  
392 E M E D A D Q F S S D G F P Q S S S Y R  
2941 GAGATGGAGGATGCCGATCAGTTCAGTAGTGATGGCTTTCCTCAGAGTAGTGTACAGG  
412 P T M P D S S Q S E D F F A D L G E I E  
3001 CCTACAATGCCAGATTCTAGTCAATCTGAAGATTTCTTTGCTGATTTGGGAGAGATAGAA  
432 A D P L D L L F S Q G G F S G D H E Q K  
3061 GCAGACCCTCTTGATCTTTTGTGTTAGTCAAGGGGGATTGAGCGGAGATCATGAGCAGAAA  
452 G S K G L D P F G L F D W S E D T N N I  
3121 GGAAGCAAGGGTTTGGATCCATTTGGTCTTTTGGATTGGTCAGAAGACACCAACAACATC  
472 S F E E A K R D L \*  
3181 TCATTTGAAGAAGCCAAGAGGGATTTATAAcaagacctcctttcaactgaaaatagactg  
3241 tttgaagaaaacaagtatgtagttatattcttggtaacaatctatctgctaaaaaaccttg  
3301 tctttttggctgtgaatttcatgtggagaggatgaagaggaagagatggggaaggttttt

3361 cttcttccttctactttcatttaaattttctttttcttggtatttaccagaacagtca  
3421 gggaagtttagggaaaaagttaaagagtaaaaaaaagacgagaagagagagagagaga  
3481 gagagagagagagagacagtgctggttgattgggagcagaagcaatggagtcccacattc  
3541 cttttggaatattggtggatgggacagaaagctgaggaacagaaggtttgaacagttaa  
3601 acaagtacatccatcagacatgactggaaagctcagcaaaggatagattgatacaaggat  
3661 gaaagaaagatgggacttgcccttctctctctttcatctttcttttcaagtgggattaa  
3721 ttattcaatccttcactctcctttgatcatgtgggcattctttaag
