# Supplementary material for: Gene Structures, Evolution and Transcriptional Profiling of the WRKY Gene Family in Castor Bean (Ricinus communis L.)
Source: PubMed Central journal article supplement (PMC4743969; doi:10.1371/journal.pone.0148243), 2016-02-05
Supplement: pone.0148243.s021.pdf [file pone.0148243.s021.pdf]

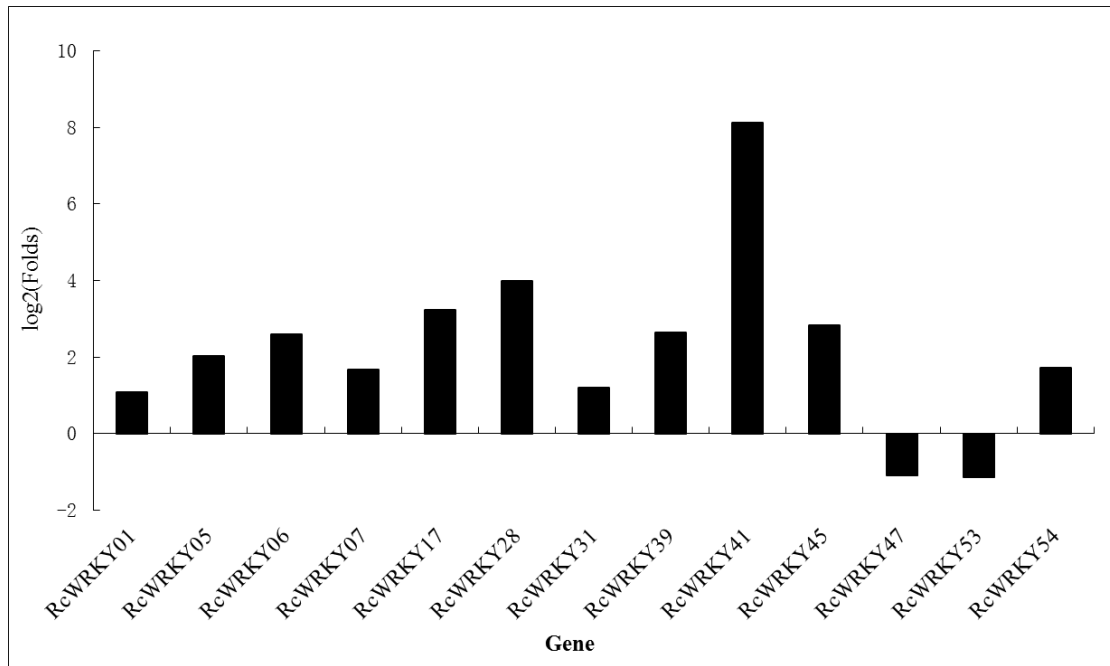

**S21 File. List of 13 differentially expressed *RcWRKY* genes upon the ABA treatment.** The y-axis represents the log<sub>2</sub> transformed folds which were resulted from the application of 10 μM ABA for 24 h by using the *in vitro* developing seeds as reported by Chandrasekaran et al., (2014) [52].
