# Supplementary material for: Gene Structures, Evolution and Transcriptional Profiling of the WRKY Gene Family in Castor Bean (Ricinus communis L.)
Source: PLoS One. 2016 Feb 5;11(2):e0148243. doi: 10.1371/journal.pone.0148243 (PMC4743969; doi:10.1371/journal.pone.0148243)
Supplement: S13 File — (PDF) [file pone.0148243.s013.pdf]

**S13 File. The gene model for *RcWRKY29*.** The coding region is marked with uppercase letters, above which is its deduced amino acids. The transcribed untranslated regions, including 5' UTR, intron and 3' UTR sequences, are marked with lowercase letters. The start and stop codons are blacked and the misannotated sequence is boxed.

[illegible]

1441 nnnnnnnnnnnnnnnnnnnnnnnnnnnnnnnnnnagGTGCAAAGAAGCGCTGAAGATCCATCA

219 I L V A T Y E G E H N H A R L S Q P E F

1501 ATCTTAGTAGCAACTTATGAAGGAGAGCACAAACCACGCGGCCTTTCACAACCCGAATT

239 S L G P N R C N S N S V P V P N S T S S

1561 TCTTTAGGCCCAAACCGATGCAATTCAAATTCAGTTCAGTTCCCAACAGTACTTCATCA

259 T P M M K V P P A S V T L D L M Q D S N

1621 ACACCTATGATGAAAAGTTTCCTCCAGCTTCTGTAACCTTGACTTGATGCAAGACAGTAAT

279 A R K A I Q E S E S P A P I Q Q I L V Q

1681 GCTAGAAAGGCAATCCAAGAATCTGAATCTCCAGCTCCAATCCAACAGATTCTGGTGCAA

299 Q M A S S L T R D P N F T A A L A A A I

1741 CAAATGGCTTCCTCATTGACAAGAGATCCAAATTTACGGCAGCACTTGCAGCTGCTATT

319 S S R F S K T P I Q K W \*

1801 TCAAGCAGATTCAGCAAGACTCCGATCCAGAAATGGTGAaattaatagtagaattaaagca

1861 ttttacttttgtctttgaatttttttttttgaaagtacttagagagtacgaagtgatgta

1921 tatagaagatggacactgattctaaatttcag
